# Supplementary material for: Combined systems pharmacology and fecal metabonomics to study the biomarkers and therapeutic mechanism of type 2 diabetic nephropathy treated with Astragalus and Leech
Source: PubMed Central journal article supplement — RSC Adv. 2018 Aug 1;8(48):27448–63. doi: 10.1039/c8ra04358b (PMC9083881; doi:10.1039/c8ra04358b), 2018-08-01

## Supplementary Information

**Table S5** Basic annotations of biomarkers from MetaboAnalyst

| No. | Query             | Match                 | HMDB      | PubChem | KEGG   | Enzymes | Transporters |
|-----|-------------------|-----------------------|-----------|---------|--------|---------|--------------|
| 1   | n-Butyrate        | Butyric acid          | HMDB00039 | 264     | C00246 | 17      | 1            |
| 2   | Deoxycholate      | Deoxycholic acid      | HMDB00626 | 222528  | C04483 | 2       | 8            |
| 3   | Leucine           | L-Leucine             | HMDB00687 | 6106    | C00123 | 7       | 1            |
| 4   | Valine            | L-Valine              | HMDB00883 | 6287    | C00183 | 6       | 1            |
| 5   | Propionate        | Propionic acid        | HMDB00237 | 1032    | C00163 | 5       | —            |
| 6   | 3-Hydroxybutyrate | 3-Hydroxybutyric acid | HMDB00357 | 441     | C01089 | 4       | —            |
| 7   | Isoleucine        | L-Isoleucine          | HMDB00172 | 6306    | C00407 | 6       | 1            |
| 8   | Lactate           | L-Lactic acid         | HMDB00190 | 107689  | C00186 | 5       | —            |
| 9   | Alanine           | L-Alanine             | HMDB00161 | 5950    | C00041 | 21      | 4            |
| 10  | Citrulline        | Citrulline            | HMDB00904 | 9750    | C00327 | 14      | —            |
| 11  | Lysine            | L-Lysine              | HMDB00182 | 5962    | C00047 | 25      | —            |
| 12  | Acetate           | Acetic acid           | HMDB00042 | 176     | C00033 | 41      | 2            |
| 13  | Glutamate         | D-Glutamic acid       | HMDB03339 | 23327   | C00217 | 2       | —            |
| 14  | Succinate         | Succinic acid         | HMDB00254 | 1110    | C00042 | 44      | —            |
| 15  | Dimethylamine     | Dimethylamine         | HMDB00087 | 674     | C00543 | 4       | —            |
| 16  | Trimethylamine    | Trimethylamine        | HMDB00906 | 1146    | C00565 | 5       | —            |
| 17  | Creatinine        | Creatinine            | HMDB00562 | 588     | C00791 | —       | —            |
| 18  | Phenylalanine     | L-Phenylalanine       | HMDB00159 | 6140    | C00079 | 19      | 2            |
| 19  | Tryptophan        | L-Tryptophan          | HMDB00929 | 6305    | C00078 | 11      | 2            |
| 20  | $\alpha$ -Glucose | D-Glucose             | HMDB00122 | 5793    | C00031 | 29      | —            |
| 21  | Glycerol          | Glycerol              | HMDB00131 | 753     | C00116 | 42      | 1            |
| 22  | Taurine           | Taurine               | HMDB00251 | 1123    | C00245 | 11      | —            |

Figure S1 Loading plot from PCA model among control group, T2DN group and treated group.

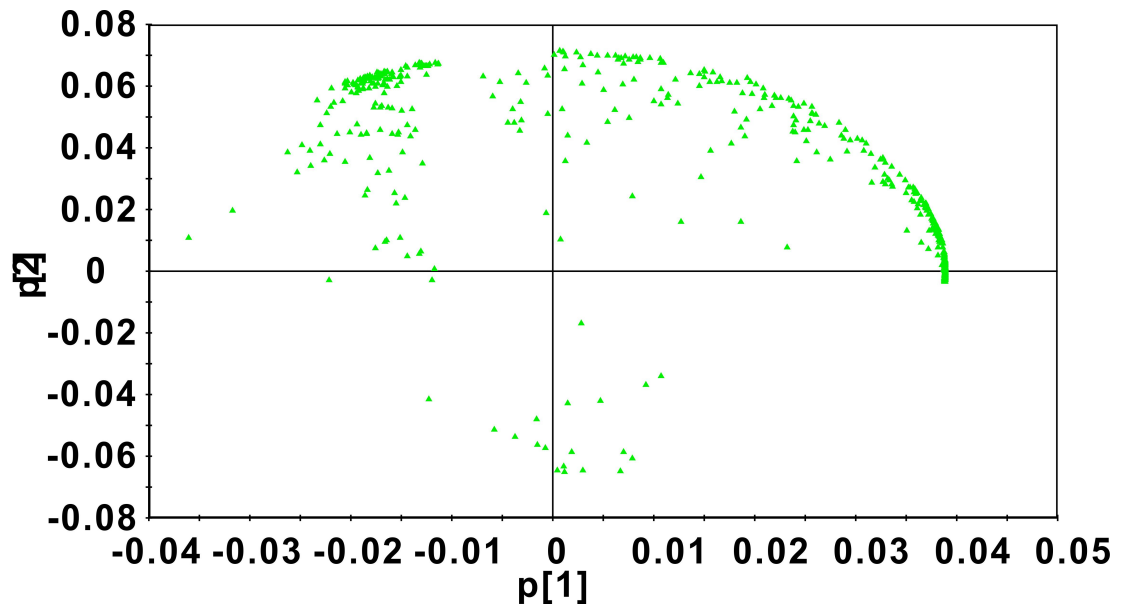

**Figure S2** Permutation test plots (200 permutations) for fecal extracts: (A) control group *VS* T2DN group; (B) T2DN group *VS* treated group.

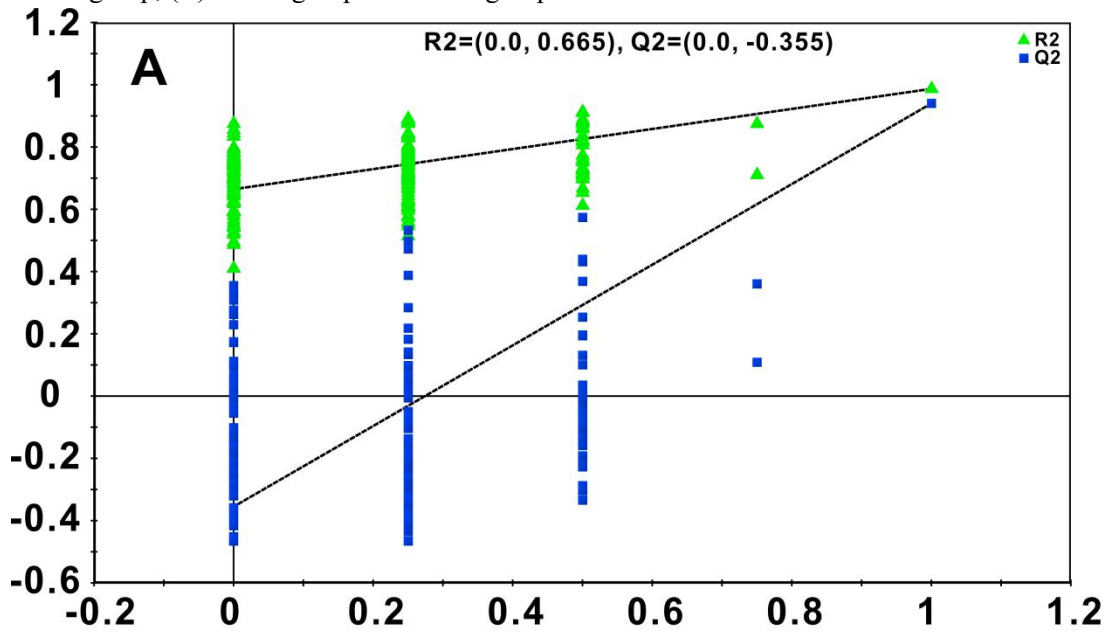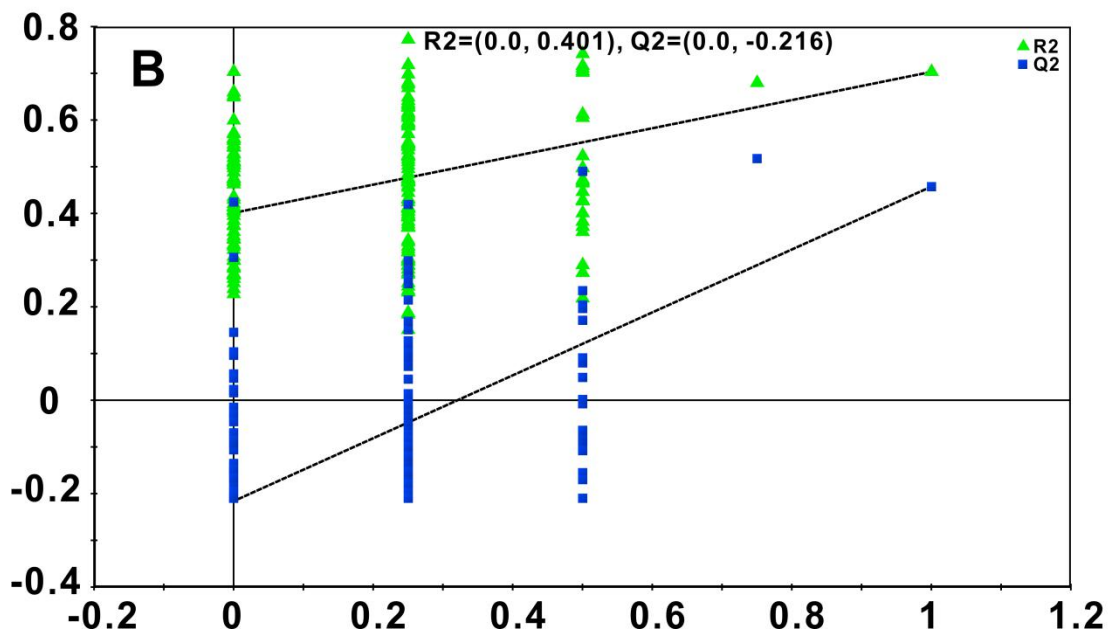

Supplement: RA-008-C8RA04358B-s005.pdf [file RA-008-C8RA04358B-s005.pdf]
