# Supplementary material for: Combined systems pharmacology and fecal metabonomics to study the biomarkers and therapeutic mechanism of type 2 diabetic nephropathy treated withAstragalusand Leech
Source: Royal Society of Chemistry journal article supplement (doi:10.1039/c8ra04358b), 2018-01-01
Supplement: c8ra04358b1.xlsx [file c8ra04358b1.xlsx]

## Sheet: Sheet1
Table S1 The active compounds screened from Astragalus and Leech by TCMSP and PubChem database
Herb	MOL ID	Molecule Name	OB(%)≧30	BBB>0.3	DL≧0.18	HL≧4	PubChem CID
Astragalus	MOL000380	(6aR,11aR)-9,10-dimethoxy-6a,11a-dihydro-6H-benzofurano[3,2-c]chromen-3-ol	64.26	0.55	0.42	8.49	14077830
	MOL000296	Hederagenin	36.91	0.96	0.75	5.35	N/A
	MOL000033	(3S,8S,9S,10R,13R,14S,17R)-10,13-dimethyl-17-[(2R,5S)-5-propan-2-yloctan-2-yl]-2,3,4,7,8,9,11,12,14,15,16,17-dodecahydro-1H-cyclopenta[a]phenanthren-3-ol	36.23	1.09	0.78	5.22	15976101
	MOL000371	3,9-di-O-methylnissolin	53.74	0.63	0.48	9	15689655
Herb	MOL ID	Molecule Name	OB(%)≧30	BBB>-0.3	DL≧0.01	HL≧4	PubChem CID
Leech	N/A	Hirudin	N/A	N/A	N/A	N/A	16138839
	MOL001464	Histamine	44.1	0.37	0.01	11.49	774
	MOL012254	Campesterol	37.58	0.98	0.71	4.63	N/A
	MOL001831	Hypoxanthine	52.29	-0.1	0.04	32.62	790
	N/A	[Glycerol, 1-hexadecyl ether]	N/A	N/A	N/A	N/A	523756
	MOL000068	L-isoleucine	59.05	-0.11	0.02	11.21	7043901
	MOL000953	Cholesterol	37.87	1.13	0.68	4.52	5997
	MOL000421	Nicotinic acid	47.65	0.21	0.02	11.98	938
	MOL001744	Uracil	42.53	-0.08	0.02	11.77	1174
	MOL000041	Phenylalanine	41.62	0.22	0.04	4.62	6925665
	MOL000067	Valine	53.33	-0.14	0.01	11.34	6971018
	N/A	Palmiticacid	N/A	N/A	N/A	N/A	985
	MOL000061	Proline	77.57	0.29	0.01	11.13	6971047
	N/A	Hirudinoidine A	N/A	N/A	N/A	N/A	101844805
	N/A	Hirudinoidine B	N/A	N/A	N/A	N/A	101844806
	N/A	Hirudinoidine C	N/A	N/A	N/A	N/A	42614051
