# Supplementary material for: Combined systems pharmacology and fecal metabonomics to study the biomarkers and therapeutic mechanism of type 2 diabetic nephropathy treated withAstragalusand Leech
Source: Royal Society of Chemistry journal article supplement (doi:10.1039/c8ra04358b), 2018-01-01
Supplement: c8ra04358b2.xlsx [file c8ra04358b2.xlsx]

## Sheet: Sheet1
Table S2 Potential target proteins of active compounds in Astragalus and Leech predicted by PharmMapper
Active compound	Fit	Norm Fit	z-score	Name of target proteins	Uniprot ID
(6aR,11aR)-9,10-dimethoxy-6a,11a-dihydro-6H-benzofurano[3,2-c]chromen-3-ol	3.745	0.9362	4.04187	cAMP-specific 3,5-cyclic phosphodiesterase 4D	PDE4D_HUMAN
	3.727	0.7455	3.98329	NONE	NONE
	3.69	0.738	3.82314	Ribosyldihydronicotinamide dehydrogenase [quinone]	NQO2_HUMAN
	3.655	0.731	3.38903	Serine/threonine-protein kinase Chk1	CHK1_HUMAN
	4.101	0.4556	2.82278	Leukocyte elastase	ELNE_HUMAN
	3.412	0.8529	2.62443	Estrogen receptor beta	Q62986
	3.726	0.3726	2.55618	Histamine N-methyltransferase	P50135
	3.404	0.851	2.41686	Cell division protein kinase 2	P24941
	3.544	0.443	2.4035	Betaine--homocysteine S-methyltransferase 1	Q93088
	3.401	0.4858	2.27068	Peptidyl-prolyl cis-trans isomerase FKBP1A	FKB1A_HUMAN
	3.279	0.6558	2.25091	Aldo-keto reductase family 1 member C3	AK1C3_HUMAN
	3.4	0.4857	2.15447	Bile acid receptor	NR1H4_HUMAN
	3.387	0.6774	2.11233	Alcohol dehydrogenase class-3	ADHX_HUMAN
	3.69	0.3355	2.06604	Phenylethanolamine N-methyltransferase	PNMT_HUMAN
	3.245	0.8112	1.94714	ADAM 17	ADA17_HUMAN
	3.205	0.6411	1.91406	Catenin alpha-1	CTNA1_HUMAN
	3.765	0.3422	1.78967	Serine/threonine-protein phosphatase PP1-gamma catalytic subunit	P36873
	3.896	0.5565	1.7729	Amine oxidase [flavin-containing] B	AOFB_HUMAN
	3.499	0.3888	1.7096	Hypoxanthine-guanine phosphoribosyltransferase	P00492
	3	1	1.55409	Steryl-sulfatase	STS_HUMAN
	2.977	0.9922	1.52547	Peptidyl-prolyl cis-trans isomerase A	P62937
	2.955	0.591	1.45135	Cytidine deaminase	CDD_HUMAN
	3.672	0.459	1.45032	Fatty acid-binding protein, heart	FABPH_HUMAN
	2.957	0.9856	1.43362	Serum albumin	ALBU_HUMAN
	2.967	0.7417	1.39931	Cyclin-A2	CCNA2_HUMAN
	2.988	0.747	1.35963	Beta-secretase 1	BACE1_HUMAN
	2.969	0.7422	1.31591	Complement factor B	CFAB_HUMAN
	2.927	0.9756	1.3139	Carbonic anhydrase 2	P00918
	3.339	0.4173	1.30633	Glucose-6-phosphate isomerase	G6PI_HUMAN
	2.963	0.9878	1.29807	Bone morphogenetic protein 2	BMP2_HUMAN
	2.923	0.7307	1.28199	Aldose reductase	ALDR_HUMAN
	2.916	0.7291	1.26465	Coagulation factor X	FA10_HUMAN
	3.188	0.3985	1.2556	Proto-oncogene tyrosine-protein kinase ABL1	P00519
	2.961	0.7401	1.25158	Dual specificity protein phosphatase 6	DUS6_HUMAN
	2.926	0.9752	1.23911	Estrogen receptor	ESR1_HUMAN
	2.965	0.593	1.23593	Glutathione-requiring prostaglandin D synthase	PTGD2_HUMAN
	2.961	0.5923	1.21802	Tyrosyl-tRNA synthetase, cytoplasmic	P54577
	2.877	0.9589	1.19637	Proto-oncogene serine/threonine-protein kinase Pim-1	P11309
	2.902	0.9672	1.19525	Apolipoprotein A-II	APOA2_HUMAN
	3.519	0.4398	1.16892	Glucocorticoid receptor	GCR_HUMAN
	2.958	0.7394	1.1535	Transthyretin	TTHY_HUMAN
	2.943	0.5887	1.13272	Placenta growth factor	PLGF_HUMAN
	2.927	0.4878	1.12225	C-1-tetrahydrofolate synthase, cytoplasmic	P11586
	2.979	0.5959	1.12182	Lanosterol synthase	ERG7_HUMAN
	3.303	0.4718	1.10481	Estrogen sulfotransferase	ST1E1_HUMAN
	2.94	0.588	1.10295	Superoxide dismutase [Mn], mitochondrial	P04179
	3.243	0.4633	1.08216	Nuclear receptor subfamily 1 group I member 2	NR1I2_HUMAN
	2.935	0.4891	1.06522	cGMP-specific 3,5-cyclic phosphodiesterase	PDE5A_HUMAN
	2.944	0.5887	1.05346	Tyrosine-protein phosphatase non-receptor type 1	PTN1_HUMAN
	2.946	0.5893	1.0466	Hepatocyte growth factor receptor	P08581
	2.826	0.9419	1.03638	Cholinesterase	CHLE_HUMAN
	2.877	0.7193	1.03381	Prothrombin	THRB_HUMAN
	2.914	0.7286	1.03186	Thymidylate synthase	TYSY_HUMAN
	2.827	0.9422	1.00813	Caspase-3	CASP3_HUMAN
	3.318	0.474	1.00792	Sulfotransferase family cytosolic 2B member 1	O00204
	2.874	0.7186	0.996094	Estrogen-related receptor gamma	P62508
	2.838	0.7095	0.988853	Dihydrofolate reductase	DYR_HUMAN
	2.891	0.7228	0.982758	Caspase-7	CASP7_HUMAN
	2.874	0.7186	0.977618	Vascular endothelial growth factor receptor 2	P35968
	2.835	0.405	0.974557	Chitotriosidase-1	Q13231
	2.869	0.7172	0.969193	Sex hormone-binding globulin	SHBG_HUMAN
	2.956	0.4222	0.968781	ADP-ribosyl cyclase 2	BST1_HUMAN
	2.899	0.7248	0.939438	cAMP-specific 3,5-cyclic phosphodiesterase 4B	PDE4B_HUMAN
	2.815	0.9385	0.937881	Androgen receptor	ANDR_HUMAN
	2.952	0.5904	0.93642	Aldo-keto reductase family 1 member C1	Q04828
	2.911	0.5823	0.925517	Macrophage metalloelastase	MMP12_HUMAN
	2.935	0.5869	0.902569	Adenosylhomocysteinase	SAHH_HUMAN
	3.212	0.4015	0.899402	Ferrochelatase, mitochondrial	P22830
	2.813	0.7033	0.879815	Complement factor D	CFAD_HUMAN
	2.851	0.7127	0.870041	Serine/threonine-protein phosphatase 5	P53041
	2.81	0.4684	0.869519	Heat shock cognate 71 kDa protein	P11142
	2.795	0.9316	0.863691	Glutathione S-transferase P	GSTP1_HUMAN
	2.965	0.3295	0.858218	Pancreatic alpha-amylase	AMYP_HUMAN
	3.216	0.6432	0.845637	S-methyl-5-thioadenosine phosphorylase	Q13126
	2.822	0.7055	0.83178	Group 10 secretory phospholipase A2	O15496
	2.914	0.5827	0.804469	cAMP-dependent protein kinase catalytic subunit alpha	P00517
hederagenin	5.258	0.7511	3.43914	Gastrotropin	FABP6_HUMAN
	4.633	0.5791	2.54196	Ferrochelatase, mitochondrial	P22830
	4.256	0.7093	2.38903	Trafficking protein particle complex subunit 3	O43617
	3.848	0.7697	2.276	Bile acid receptor	NR1H4_HUMAN
	4.207	0.6011	2.18535	Lanosterol synthase	ERG7_HUMAN
	3.708	0.7416	2.18068	Vascular endothelial growth factor receptor 2	P35968
	4.127	0.8255	2.15504	SEC14-like protein 2	O76054
	4.171	0.5959	2.09567	Cytochrome P450 2C8	CP2C8_HUMAN
	3.852	0.428	2.08114	Phosphatidylinositol 3-kinase regulatory subunit alpha	P85A_HUMAN
	3.751	0.6251	1.98018	Aldo-keto reductase family 1 member C3	AK1C3_HUMAN
	3.905	0.6508	1.94094	Ephrin type-B receptor 4	EPHB4_HUMAN
	3.553	0.8882	1.9284	Nuclear receptor ROR-alpha	RORA_HUMAN
	3.882	0.7764	1.90765	Corticosteroid 11-beta-dehydrogenase isozyme 1	DHI1_HUMAN
	3.778	0.7556	1.79575	Tyrosine-protein phosphatase non-receptor type 11	PTN11_HUMAN
	4.271	0.3286	1.74215	Endothelial protein C receptor	EPCR_HUMAN
	5.079	0.6349	1.73937	Retinol-binding protein 4	RET4_HUMAN
	3.594	0.2764	1.69793	Amine oxidase [flavin-containing] A	AOFA_HUMAN
	3.856	0.4819	1.68188	Stromelysin-1	MMP3_HUMAN
	3.985	0.4981	1.67552	Caspase-3	CASP3_HUMAN
	3.674	0.4592	1.65669	Heat shock protein HSP 90-beta	P08238
	3.735	0.9339	1.64278	Vitamin D-binding protein	VTDB_HUMAN
	3.514	0.7028	1.63576	Histone deacetylase 8	Q9BY41
	4.666	0.5185	1.57943	Dual specificity mitogen-activated protein kinase kinase 1	MP2K1_HUMAN
	3.845	0.4807	1.56934	Interleukin-2	IL2_HUMAN
	3.791	0.6318	1.51431	Glutathione S-transferase A1	P08263
	3.564	0.594	1.46582	Flavin reductase	P30043
	3.646	0.5208	1.40772	72 kDa type IV collagenase	MMP2_HUMAN
	3.571	0.5951	1.3935	Receptor tyrosine-protein kinase erbB-4	ERBB4_HUMAN
	3.382	0.5636	1.35388	Peroxisome proliferator-activated receptor delta	PPARD_HUMAN
	3.427	0.5711	1.31103	Insulin-like growth factor IA	P01343
	4.004	0.5721	1.29356	Sulfotransferase family cytosolic 2B member 1	O00204
	3.545	0.7089	1.27979	Prothrombin	THRB_HUMAN
	3.767	0.6278	1.27852	Adenosine kinase	P55263
	3.596	0.5993	1.24318	Oxysterols receptor LXR-beta	NR1H2_HUMAN
	3.82	0.6366	1.22352	Alcohol dehydrogenase class-3	ADHX_HUMAN
	3.619	0.6032	1.19572	Proto-oncogene tyrosine-protein kinase LCK	LCK_HUMAN
	3.464	0.433	1.14618	Vitamin D3 receptor	VDR_HUMAN
	4.092	0.4546	1.11393	Retinoic acid receptor beta	RARB_HUMAN
	3.484	0.6969	1.10123	Calmodulin	CALM_HUMAN
	3.42	0.4886	1.09624	Deoxycytidine kinase	DCK_HUMAN
	3.343	0.6687	1.08982	Aldo-keto reductase family 1 member C1	Q04828
	3.289	0.6578	1.08045	Glutathione S-transferase P	GSTP1_HUMAN
	3.485	0.697	1.07451	Mineralocorticoid receptor	MCR_HUMAN
	3.643	0.6071	1.05629	Glutathione-requiring prostaglandin D synthase	PTGD2_HUMAN
	3.316	0.6631	1.05168	cAMP-dependent protein kinase catalytic subunit alpha	P00517
	3.719	0.4649	0.97154	Angiopoietin-1 receptor	TIE2_HUMAN
	3.239	0.6477	0.965747	Steroid hormone receptor ERR1	P11474
	3.433	0.5721	0.965023	Mitogen-activated protein kinase 10	P53779
	3.43	0.5717	0.96112	Oxysterols receptor LXR-alpha	NR1H3_HUMAN
	3.302	0.5503	0.93014	Alpha-1-antitrypsin	A1AT_HUMAN
	3.539	0.4424	0.916602	Proto-oncogene tyrosine-protein kinase ABL1	P00519
	3.195	0.6391	0.901505	Alcohol dehydrogenase 1C	P00326
	3.37	0.4814	0.894549	Peptidyl-prolyl cis-trans isomerase FKBP1A	FKB1A_HUMAN
	3.542	0.5903	0.865452	E3 ubiquitin-protein ligase Mdm2	MDM2_HUMAN
	3.49	0.3878	0.855111	Lactoylglutathione lyase	LGUL_HUMAN
	3.404	0.5674	0.850034	Tyrosine-protein kinase JAK3	JAK3_HUMAN
	3.198	0.6395	0.83433	Dipeptidyl peptidase 4	DPP4_HUMAN
	3.628	0.4535	0.818125	Retinoic acid receptor alpha	RARA_HUMAN
	3.704	0.5292	0.808597	Fatty acid-binding protein, heart	FABPH_HUMAN
	3.799	0.5427	0.803054	Fatty acid-binding protein, brain	FABP7_HUMAN
(3S,8S,9S,10R,13R,14S,17R)-10,13-dimethyl-17-[(2R,5S)-5-propan-2-yloctan-2-yl]-2,3,4,7,8,9,11,12,14,15,16,17-dodecahydro-1H-cyclopenta[a]phenanthren-3-ol	4.396	0.7327	2.9472	Beta-secretase 1	P56817
	4.535	0.9071	2.90268	Mineralocorticoid receptor	MCR_HUMAN
	4.177	0.8353	2.75134	Bile acid receptor	NR1H4_HUMAN
	5.248	0.5248	2.63107	Vitamin D3 receptor	VDR_HUMAN
	4.432	0.554	2.34418	Proto-oncogene tyrosine-protein kinase ABL1	P00519
	3.771	0.9427	2.18682	Nuclear receptor ROR-alpha	RORA_HUMAN
	4.274	0.7124	2.13464	Trafficking protein particle complex subunit 3	O43617
	3.964	0.6606	2.08138	Peroxisome proliferator-activated receptor alpha	PPARA_HUMAN
	3.753	0.6255	1.95736	Renin	RENI_HUMAN
	4.202	0.6002	1.89879	Lanosterol synthase	ERG7_HUMAN
	4.234	0.7057	1.89397	Sex hormone-binding globulin	SHBG_HUMAN
	3.754	0.7509	1.85947	cAMP-dependent protein kinase catalytic subunit alpha	P00517
	3.883	0.4314	1.83817	Phosphatidylinositol 3-kinase regulatory subunit alpha	P85A_HUMAN
	3.864	0.7729	1.72411	Calmodulin	CALM_HUMAN
	4.082	0.8165	1.68075	Estradiol 17-beta-dehydrogenase 1	P14061
	4.353	0.6218	1.67166	Gastrotropin	FABP6_HUMAN
	4.508	0.5635	1.66887	Basic fibroblast growth factor receptor 1	FGFR1_HUMAN
	4.089	0.5841	1.66337	Cytochrome P450 2C8	CP2C8_HUMAN
	3.621	0.6035	1.64165	Methionine aminopeptidase 2	AMPM2_HUMAN
	3.857	0.9642	1.62906	Vitamin D-binding protein	VTDB_HUMAN
	3.991	0.7982	1.60285	SEC14-like protein 2	O76054
	3.761	0.4701	1.5731	Heat shock protein HSP 90-beta	P08238
	4.171	0.5959	1.57183	Hepatocyte nuclear factor 4-gamma	Q14541
	3.932	0.4915	1.56944	Stromelysin-1	MMP3_HUMAN
	3.847	0.7693	1.53017	Corticosteroid 11-beta-dehydrogenase isozyme 1	DHI1_HUMAN
	3.706	0.6176	1.51985	Flavin reductase	P30043
	4.167	0.5209	1.51141	Ferrochelatase, mitochondrial	P22830
	4.217	0.6024	1.49902	Mitogen-activated protein kinase 10	MK10_HUMAN
	3.803	0.6339	1.49866	Tyrosine-protein kinase JAK3	JAK3_HUMAN
	4.262	0.6089	1.47873	Sulfotransferase family cytosolic 2B member 1	O00204
	4.689	0.521	1.39819	Dual specificity mitogen-activated protein kinase kinase 1	MP2K1_HUMAN
	4.391	0.3992	1.3756	Phosphatidylcholine transfer protein	Q9UKL6
	3.769	0.6282	1.35387	Retinol-binding protein 4	RET4_HUMAN
	3.764	0.6273	1.34447	Oxysterols receptor LXR-beta	NR1H2_HUMAN
	3.423	0.6846	1.34147	Vascular endothelial growth factor receptor 2	P35968
	3.812	0.6354	1.30724	Histone deacetylase 8	HDAC8_HUMAN
	4.681	0.4681	1.30017	Retinoic acid receptor RXR-beta	RXRB_HUMAN
	3.76	0.6266	1.27043	Tyrosine-protein kinase ITK/TSK	Q08881
	3.565	0.5941	1.25703	Alpha-1-antitrypsin	A1AT_HUMAN
	3.655	0.6092	1.21532	Oxysterols receptor LXR-alpha	NR1H3_HUMAN
	3.799	0.4748	1.1941	Interleukin-2	IL2_HUMAN
	3.639	0.7277	1.16052	Tyrosine-protein phosphatase non-receptor type 11	PTN11_HUMAN
	3.938	0.4922	1.15112	Retinoic acid receptor alpha	RARA_HUMAN
	3.44	0.688	1.1373	Dipeptidyl peptidase 4	DPP4_HUMAN
	3.736	0.6227	1.13086	Glutathione S-transferase A1	P08263
	3.556	0.5927	1.08657	Receptor tyrosine-protein kinase erbB-4	ERBB4_HUMAN
	3.782	0.5403	1.08523	Protein kinase C theta type	KPCT_HUMAN
	3.704	0.5292	1.08327	Retinoic acid receptor gamma	RARG_HUMAN
	3.714	0.5306	1.08283	Tyrosine-protein kinase ZAP-70	ZAP70_HUMAN
	3.799	0.6332	1.08253	Adenosine kinase	P55263
	4.077	0.5825	1.04346	Fatty acid-binding protein, brain	FABP7_HUMAN
	3.686	0.5265	1.03124	Insulin-like growth factor IA	P01343
	3.379	0.6759	1.02914	Glutathione S-transferase P	GSTP1_HUMAN
	3.546	0.5065	0.982816	72 kDa type IV collagenase	MMP2_HUMAN
	3.516	0.5023	0.978901	Protein S100-A9	S10A9_HUMAN
	4.123	0.4581	0.955898	Retinoic acid receptor beta	RARB_HUMAN
	4.078	0.5098	0.887576	Glucocorticoid receptor	GCR_HUMAN
	3.774	0.6291	0.885491	Alcohol dehydrogenase class-3	ADHX_HUMAN
	3.272	0.6543	0.855846	cAMP-specific 3,5-cyclic phosphodiesterase 4D	PDE4D_HUMAN
	3.595	0.5992	0.850086	Hepatocyte growth factor receptor	MET_HUMAN
	3.971	0.4963	0.824367	Histamine N-methyltransferase	P50135
	3.774	0.7547	0.808715	S-methyl-5-thioadenosine phosphorylase	Q13126
3,9-di-O-methylnissolin	3.783	0.7566	4.25195	NONE	NONE
	3.752	0.9379	4.1245	cAMP-specific 3,5-cyclic phosphodiesterase 4D	PDE4D_HUMAN
	3.676	0.7352	3.83441	Ribosyldihydronicotinamide dehydrogenase [quinone]	NQO2_HUMAN
	3.657	0.7314	3.45764	Serine/threonine-protein kinase Chk1	CHK1_HUMAN
	3.55	0.355	3.31601	Hydroxyacyl-coenzyme A dehydrogenase, mitochondrial	Q16836
	3.576	0.447	2.48003	Neprilysin	NEP_HUMAN
	3.596	0.3596	2.20368	Histamine N-methyltransferase	P50135
	4.039	0.577	2.10216	Amine oxidase [flavin-containing] B	AOFB_HUMAN
	3.401	0.4252	2.01096	Betaine--homocysteine S-methyltransferase 1	Q93088
	3.587	0.3261	1.82942	Phenylethanolamine N-methyltransferase	PNMT_HUMAN
	3.724	0.3386	1.73402	Serine/threonine-protein phosphatase PP1-gamma catalytic subunit	P36873
	3.201	0.4572	1.73039	Deoxycytidine kinase	DCK_HUMAN
	3.468	0.3853	1.67242	Hypoxanthine-guanine phosphoribosyltransferase	P00492
	3	1	1.66735	Serum albumin	ALBU_HUMAN
	2.991	0.997	1.65543	Peptidyl-prolyl cis-trans isomerase A	P62937
	3	1	1.63554	Steryl-sulfatase	STS_HUMAN
	3	1	1.62003	Apolipoprotein A-II	APOA2_HUMAN
	3.093	0.6185	1.604	Catenin alpha-1	CTNA1_HUMAN
	3.408	0.426	1.57582	Glucose-6-phosphate isomerase	G6PI_HUMAN
	3.642	0.3311	1.53613	Insulin receptor	INSR_HUMAN
	3.664	0.4581	1.53534	Glucocorticoid receptor	GCR_HUMAN
	3.448	0.4925	1.53519	Estrogen sulfotransferase	ST1E1_HUMAN
	3.117	0.5196	1.43529	Dihydroorotate dehydrogenase, mitochondrial	PYRD_HUMAN
	2.976	0.9918	1.43347	Bone morphogenetic protein 2	BMP2_HUMAN
	2.983	0.7458	1.40557	Estrogen receptor beta	Q62986
	2.942	0.7354	1.38973	Cyclin-A2	CCNA2_HUMAN
	3.45	0.4929	1.37417	Sulfotransferase family cytosolic 2B member 1	O00204
	2.973	0.7432	1.36267	Dual specificity protein phosphatase 6	DUS6_HUMAN
	2.965	0.7413	1.35643	Beta-secretase 1	BACE1_HUMAN
	2.966	0.7415	1.34588	Serine/threonine-protein phosphatase 5	P53041
	2.908	0.5816	1.32353	Heat shock protein HSP 90-alpha	HS90A_HUMAN
	2.962	0.5924	1.29674	Glutathione-requiring prostaglandin D synthase	PTGD2_HUMAN
	2.963	0.5927	1.29338	Placenta growth factor	PLGF_HUMAN
	2.94	0.49	1.27299	C-1-tetrahydrofolate synthase, cytoplasmic	P11586
	2.896	0.7241	1.27246	Coagulation factor X	FA10_HUMAN
	2.913	0.9711	1.26264	Estrogen receptor	ESR1_HUMAN
	2.907	0.7268	1.2145	Prothrombin	THRB_HUMAN
	2.937	0.7343	1.19529	cAMP-specific 3,5-cyclic phosphodiesterase 4B	PDE4B_HUMAN
	3.538	0.4422	1.1815	Fatty acid-binding protein, heart	FABPH_HUMAN
	2.949	0.5898	1.14745	Aldo-keto reductase family 1 member C3	AK1C3_HUMAN
	2.933	0.7333	1.14348	Transthyretin	TTHY_HUMAN
	2.865	0.7162	1.11137	Corticosteroid 11-beta-dehydrogenase isozyme 1	DHI1_HUMAN
	2.846	0.5693	1.1112	Baculoviral IAP repeat-containing protein 4	XIAP_HUMAN
	2.951	0.5903	1.10075	Lanosterol synthase	ERG7_HUMAN
	2.828	0.9428	1.09955	Proto-oncogene serine/threonine-protein kinase Pim-1	P11309
	2.817	0.9389	1.07345	Cholinesterase	CHLE_HUMAN
	2.928	0.5857	1.06229	Hepatocyte growth factor receptor	P08581
	2.829	0.9429	1.06168	Carbonic anhydrase 2	CAH2_HUMAN
	2.911	0.4852	1.05876	cGMP-specific 3,5-cyclic phosphodiesterase	PDE5A_HUMAN
	2.963	0.5927	1.05151	Aldo-keto reductase family 1 member C1	Q04828
	2.818	0.9392	1.04568	Caspase-3	CASP3_HUMAN
	2.828	0.404	1.04133	Chitotriosidase-1	Q13231
	2.86	0.715	1.02179	Sex hormone-binding globulin	SHBG_HUMAN
	3.173	0.3526	0.993324	Nitric oxide synthase, inducible	NOS2_HUMAN
	2.933	0.419	0.990538	Histo-blood group ABO system transferase	P16442
	2.858	0.4763	0.96938	C-C motif chemokine 5	CCL5_HUMAN
	2.829	0.7072	0.932961	Estrogen-related receptor gamma	P62508
	2.806	0.7014	0.930268	Cell division protein kinase 2	P24941
	2.803	0.7007	0.9271	Complement factor D	CFAD_HUMAN
	2.988	0.498	0.905463	NAD(P)H dehydrogenase [quinone] 1	NQO1_HUMAN
	2.821	0.7052	0.901971	Group 10 secretory phospholipase A2	O15496
	2.875	0.5749	0.894869	Ephrin type-B receptor 4	EPHB4_HUMAN
	2.912	0.5825	0.883059	cAMP-dependent protein kinase catalytic subunit alpha	P00517
	2.903	0.7258	0.872239	Progesterone receptor	PRGR_HUMAN
	2.867	0.5733	0.867572	Alcohol dehydrogenase 1C	P00326
	3.128	0.4468	0.862249	L-serine dehydratase	P20132
	2.866	0.3185	0.838267	Pancreatic alpha-amylase	AMYP_HUMAN
	3.139	0.4485	0.834837	Nuclear receptor subfamily 1 group I member 2	NR1I2_HUMAN
	3.275	0.4678	0.823172	Angiotensin-converting enzyme	ACE_HUMAN
	2.914	0.4857	0.822016	Alpha-1-antitrypsin	A1AT_HUMAN
Hirudin	8.041	0.8041	3.39934	NAD-dependent malic enzyme, mitochondrial	MAOM_HUMAN
	7.888	0.7888	3.39626	Hydroxyacyl-coenzyme A dehydrogenase, mitochondrial	Q16836
	7.504	0.938	3.23752	Glutaryl-CoA dehydrogenase, mitochondrial	Q92947
	7.827	0.8697	3.10693	Hepatocyte growth factor	P14210
	7.709	0.8566	2.98405	PMS1 protein homolog 2	P54278
	7.811	0.8678	2.7914	Inositol-trisphosphate 3-kinase A	P23677
	6.967	0.8709	2.68147	Glutathione S-transferase A1	P08263
	8.283	0.9203	2.63522	E-selectin	LYAM2_HUMAN
	6.94	0.9914	2.59271	Hydroxyacylglutathione hydrolase, mitochondrial	Q16775
	7.677	0.853	2.59234	Glucose-6-phosphate 1-dehydrogenase	G6PD_HUMAN
	7.635	0.9543	2.51694	Cell division protein kinase 7	P50613
	6.958	0.9939	2.48976	Dihydrofolate reductase	DYR_HUMAN
	6.988	0.9983	2.45568	Tyrosine-protein phosphatase non-receptor type 1	PTN1_HUMAN
	7.348	0.9185	2.41154	Neprilysin	NEP_HUMAN
	7.884	0.657	2.39142	Isovaleryl-CoA dehydrogenase, mitochondrial	P26440
	7.551	0.9438	2.38964	Glutathione-requiring prostaglandin D synthase	PTGD2_HUMAN
	7.986	0.8873	2.38923	Glutathione S-transferase Mu 2	GSTM2_HUMAN
	6.761	0.8452	2.36518	Acetyl-CoA acetyltransferase, mitochondrial	P24752
	6.985	0.9979	2.36469	Pleckstrin homology domain-containing family A member 4	Q9H4M7
	8.263	0.9181	2.34338	Mitogen-activated protein kinase 12	MK12_HUMAN
	7.524	0.836	2.32799	Glutathione S-transferase Mu 1	GSTM1_HUMAN
	6.59	0.9415	2.29619	Phosphopantothenoylcysteine decarboxylase	Q96CD2
	7.513	0.9391	2.2731	Chymase	CMA1_HUMAN
	6.996	0.9994	2.25277	cGMP-specific 3,5-cyclic phosphodiesterase	PDE5A_HUMAN
	6.933	0.8666	2.22811	Sulfotransferase family cytosolic 2B member 1	O00204
	6.882	0.9831	2.20547	Mast/stem cell growth factor receptor	KIT_HUMAN
	6.916	0.988	2.19976	NONE	NONE
	6.847	0.9781	2.17459	Ephrin type-A receptor 2	EPHA2_HUMAN
	7.655	0.6959	2.16168	GTP-binding nuclear protein Ran	RAN_HUMAN
	6.343	0.7929	2.12487	Phosphatidylinositol 3-kinase regulatory subunit alpha	P85A_HUMAN
	7.707	0.8564	2.11877	Non-secretory ribonuclease	P10153
	6.331	0.9044	2.10638	GTP-binding protein Rheb	Q62639
	6.873	0.9818	2.09768	Phospholipase A2, membrane associated	P14555
	6.572	0.7302	2.04622	Proto-oncogene tyrosine-protein kinase LCK	LCK_HUMAN
	6.95	0.9929	2.01348	Glutathione S-transferase theta-2	GSTT2_HUMAN
	7.632	0.7632	2.01183	Maleylacetoacetate isomerase	O43708
	7.694	0.9617	2.00173	ADP-ribosylation factor 4	P18085
	7.605	0.845	1.9749	ADP-ribosylation factor-like protein 5A	Q9Y689
	5.844	0.5844	1.95399	Quinone oxidoreductase	QOR_HUMAN
	7.28	0.8089	1.92647	Tryptophanyl-tRNA synthetase, cytoplasmic	P23381
	5.975	0.9958	1.92628	Fructose-bisphosphate aldolase A	ALDOA_HUMAN
	6.548	0.9355	1.91757	Glycogen phosphorylase, liver form	P06737
	7.535	0.9419	1.90713	Uridine-cytidine kinase 2	Q9BZX2
	6.038	0.8625	1.9053	Phosphatidylinositol transfer protein alpha isoform	Q00169
	7.262	0.9077	1.89184	Branched-chain-amino-acid aminotransferase, mitochondrial	O15382
	7.892	0.5637	1.88824	Sepiapterin reductase	P35270
	6.025	0.8608	1.86346	Heat shock protein HSP 90-alpha	HS90A_HUMAN
	6.765	0.9664	1.85845	Neutrophil gelatinase-associated lipocalin	NGAL_HUMAN
	5.938	0.9897	1.83473	Prothrombin	THRB_HUMAN
	5.929	0.9881	1.81469	Protein-glutamine gamma-glutamyltransferase E	TGM3_HUMAN
	7.359	0.7359	1.79753	Macrophage metalloelastase	MMP12_HUMAN
	7.609	0.9511	1.79126	Thymidylate kinase	KTHY_HUMAN
	7.221	0.8024	1.78414	Lactoylglutathione lyase	LGUL_HUMAN
	7.855	0.7855	1.7841	Kinesin-like protein KIF11	KIF11_HUMAN
	5.913	0.9856	1.77628	MAP kinase-activated protein kinase 2	P49137
	7.344	0.918	1.76359	Cell division control protein 42 homolog	CDC42_HUMAN
	7.612	0.8458	1.76288	Glutathione S-transferase A3	Q16772
	6.645	0.8306	1.75967	NAD(P) transhydrogenase, mitochondrial	Q13423
	7.789	0.8654	1.75564	Bifunctional purine biosynthesis protein PURH	PUR9_HUMAN
	5.907	0.9845	1.75026	Prostatic acid phosphatase	PPAP_HUMAN
	6.471	0.9244	1.72509	Cathepsin G	CATG_HUMAN
	5.963	0.9939	1.70458	Flavin reductase	P30043
	6.012	0.8588	1.69711	Nicotinamide mononucleotide adenylyltransferase 3	Q96T66
	7.444	0.6767	1.68031	Scavenger mRNA-decapping enzyme DcpS	Q96C86
	5.576	0.5576	1.67335	L-xylulose reductase	Q7Z4W1
	5.676	0.946	1.66634	Uridine 5-monophosphate synthase	P11172
	6.327	0.9038	1.65805	Nicotinamide mononucleotide adenylyltransferase 1	Q9HAN9
	5.358	0.893	1.65438	T-cell surface glycoprotein CD1a	CD1A_HUMAN
	5.885	0.9808	1.65294	Thyroid hormone receptor beta-2	P37243
	5.936	0.9894	1.64662	Glutathione reductase, mitochondrial	P00390
	7.615	0.8461	1.63395	Spliceosome RNA helicase BAT1	Q13838
	5.61	0.8014	1.6142	RAC-beta serine/threonine-protein kinase	AKT2_HUMAN
	5.582	0.9304	1.5958	Coagulation factor VII	FA7_HUMAN
	7.037	0.8796	1.59501	Lysozyme C	P61626
	6.701	0.9572	1.57199	Thyroid hormone receptor beta	P10828
	5.823	0.9704	1.54646	Arylsulfatase A	ARSA_HUMAN
	6.518	0.8148	1.52246	Glutathione S-transferase omega-1	GSTO1_HUMAN
	7.188	0.7987	1.50101	Growth factor receptor-bound protein 2	GRB2_HUMAN
	6.515	0.7239	1.4733	Ras-related protein Rab-11A	RB11A_HUMAN
	5.802	0.8289	1.47181	Vascular endothelial growth factor receptor 2	P35968
	5.38	0.8967	1.46625	Cyclin-A2	CCNA2_HUMAN
	6.183	0.8833	1.45719	Proactivator polypeptide	P07602
	7.709	0.7709	1.45411	Nucleoside diphosphate kinase B	NDKB_HUMAN
	5.646	0.8066	1.44332	Histone-lysine N-methyltransferase SETD7	SETD7_HUMAN
	7.571	0.6883	1.43575	GTPase HRas	RASH_HUMAN
	5.128	0.8547	1.43221	Dipeptidyl peptidase 4	DPP4_HUMAN
	6.469	0.7188	1.40802	Ras-related protein Rab-5A	RAB5A_HUMAN
	7.704	0.7003	1.39376	Ras-related C3 botulinum toxin substrate 1	RAC1_HUMAN
	6.468	0.7187	1.39297	Ras-related protein Rab-9	P51151
	7.131	0.6483	1.38232	UDP-N-acetylhexosamine pyrophosphorylase	Q16222
	4.904	0.9809	1.35682	Aldose reductase	ALDR_HUMAN
	7.583	0.8426	1.35602	5(3)-deoxyribonucleotidase, mitochondrial	Q9NPB1
	5.496	0.916	1.33878	Complement C1s subcomponent	C1S_HUMAN
	7.659	0.6383	1.33516	RAC-alpha serine/threonine-protein kinase	AKT1_HUMAN
	6.616	0.8271	1.33034	Ornithine aminotransferase, mitochondrial	OAT_HUMAN
	6.438	0.9196	1.32883	Bifunctional 3-phosphoadenosine 5-phosphosulfate synthetase 1	O43252
	6.995	0.8744	1.32739	Glucose-6-phosphate isomerase	G6PI_HUMAN
	7.496	0.8329	1.32697	Pyruvate kinase isozymes R/L	KPYR_HUMAN
	7.265	0.7265	1.32675	Caspase-1	CASP1_HUMAN
	4.931	0.9861	1.31931	Urokinase-type plasminogen activator	UROK_HUMAN
	7.775	0.7069	1.31234	ADP-ribosylation factor-like protein 5B	Q9D4P0
	6.871	0.9815	1.30668	Proto-oncogene tyrosine-protein kinase Src	SRC_HUMAN
	7.972	0.8858	1.25728	Dihydroorotate dehydrogenase, mitochondrial	PYRD_HUMAN
	5.733	0.819	1.25473	Rho GTPase-activating protein 1	Q07960
	4.894	0.9788	1.24956	Thymidylate synthase	TYSY_HUMAN
	7.374	0.7374	1.24515	Eukaryotic translation initiation factor 4E	P06730
	4.939	0.9878	1.24385	Insulin-like growth factor 1 receptor	IGF1R_HUMAN
	6.275	0.8964	1.2431	Serine--pyruvate aminotransferase	SPYA_HUMAN
	5.82	0.9701	1.23812	Methionine aminopeptidase 2	AMPM2_HUMAN
	4.586	0.9172	1.23654	Protein-glutamine gamma-glutamyltransferase 2	TGM2_HUMAN
	5.362	0.8937	1.21653	Eosinophil cationic protein	P12724
	4.892	0.9784	1.21582	UDP-glucose 4-epimerase	GALE_HUMAN
	7.807	0.9758	1.2151	Dipeptidase 1	DPEP1_HUMAN
	4.794	0.9587	1.20853	3-hydroxy-3-methylglutaryl-coenzyme A reductase	HMDH_HUMAN
	6.443	0.7159	1.19795	Leukotriene A-4 hydrolase	LKHA4_HUMAN
	5.101	0.7288	1.18621	Delta-aminolevulinic acid dehydratase	HEM2_HUMAN
	7.732	0.7029	1.18619	Fibrinogen gamma chain	FIBG_HUMAN
	6.518	0.9311	1.18275	L-serine dehydratase	P20132
	5.375	0.7679	1.17968	Soluble calcium-activated nucleotidase 1	Q8WVQ1
	7.556	0.6869	1.17578	Riboflavin kinase	Q969G6
	7.673	0.6976	1.14547	Bile salt sulfotransferase	Q06520
	6.073	0.5521	1.1407	Adenylate kinase isoenzyme 1	P00568
	5.057	0.8429	1.12717	Catalase	CATA_HUMAN
	6.218	0.6909	1.126	Beta-secretase 1	BACE1_HUMAN
	7.858	0.7144	1.12316	Death-associated protein kinase 1	DAPK1_HUMAN
	4.614	0.9228	1.10734	Neutrophil collagenase	MMP8_HUMAN
	4.815	0.9629	1.10429	Ribonuclease 4	P34096
	6.013	0.859	1.08571	Inosine-5-monophosphate dehydrogenase 1	IMDH1_HUMAN
	6.366	0.7073	1.07154	Serine/threonine-protein phosphatase PP1-gamma catalytic subunit	P36873
	5.463	0.9105	1.06785	Glutathione S-transferase P	GSTP1_HUMAN
	5.845	0.8349	1.04457	Heat shock 70 kDa protein 1	P08107
	6.272	0.8961	1.04351	Glycogen synthase kinase-3 beta	GSK3B_HUMAN
	7.94	0.7218	1.03285	6-phosphofructo-2-kinase/fructose-2,6-biphosphatase 1	P07953
	4.984	0.9968	1.02752	Pyruvate dehydrogenase E1 component subunit beta, mitochondrial	P11177
	7.829	0.6524	1.02716	Tyrosine-protein kinase BTK	BTK_HUMAN
	6.724	0.6724	0.992647	Rho-related GTP-binding protein RhoE	P61587
	7.429	0.9287	0.98611	Farnesyl pyrophosphate synthetase	FPPS_HUMAN
	7.653	0.7653	0.973795	3 histone mRNA exonuclease 1	Q8IV48
	5.506	0.6883	0.936472	Estrogen sulfotransferase	ST1E1_HUMAN
	7.239	0.7239	0.93422	Deoxyuridine 5-triphosphate nucleotidohydrolase, mitochondrial	DUT_HUMAN
	5.489	0.9148	0.917804	Triosephosphate isomerase	TPIS_HUMAN
	4.827	0.9654	0.897767	Inosine-5-monophosphate dehydrogenase 2	IMDH2_HUMAN
	5.985	0.855	0.894177	Focal adhesion kinase 1	FAK1_HUMAN
	7.586	0.6322	0.883681	Sulfotransferase 1A1	ST1A1_HUMAN
	7.839	0.7126	0.86065	Antigen peptide transporter 1	Q03518
	6.733	0.9619	0.849534	Fatty acid-binding protein, heart	FABPH_HUMAN
	4.937	0.9875	0.825388	Ornithine carbamoyltransferase, mitochondrial	P00480
	7.38	0.6709	0.818489	Apoptotic protease-activating factor 1	APAF_HUMAN
	5.318	0.8864	0.806321	Serine/threonine-protein kinase PAK 6	PAK6_HUMAN
Histamine	2.861	0.4768	1.7711	Nitric oxide synthase, inducible	NOS2_HUMAN
	2.895	0.3619	1.64542	Beta-secretase 1	BACE1_HUMAN
	2.841	0.2841	1.46771	Tryptase beta-2	TRYB2_HUMAN
	2.846	0.5691	1.43124	Mitogen-activated protein kinase 14	Q16539
	2.751	0.9172	1.42656	Carbonic anhydrase 2	CAH2_HUMAN
	2.787	0.4644	1.38815	Cyclin-A2	CCNA2_HUMAN
	2.736	0.684	1.34317	NONE	NONE
	2.874	0.4106	1.25409	Cathepsin S	CATS_HUMAN
	2.9	0.3624	1.20604	Glutathione reductase, mitochondrial	P00390
	3.554	0.3554	0.930113	Neprilysin	NEP_HUMAN
campesterol	4.143	0.6904	2.84531	Peroxisome proliferator-activated receptor alpha	PPARA_HUMAN
	4.622	0.5777	2.44586	Retinoic acid receptor gamma	RARG_HUMAN
	5.285	0.5872	2.41545	Dual specificity mitogen-activated protein kinase kinase 1	MP2K1_HUMAN
	4.699	0.6713	2.33361	Fatty acid-binding protein, brain	FABP7_HUMAN
	3.876	0.646	2.25166	Flavin reductase	P30043
	4.391	0.6273	2.25003	Hepatocyte nuclear factor 4-gamma	Q14541
	3.699	0.6165	2.21157	cGMP-specific 3,5-cyclic phosphodiesterase	PDE5A_HUMAN
	3.952	0.6586	2.19356	Oxysterols receptor LXR-alpha	NR1H3_HUMAN
	3.645	0.9111	2.00015	Mitogen-activated protein kinase 14	Q16539
	3.654	0.609	1.95712	Histo-blood group ABO system transferase	P16442
	4.33	0.6186	1.87553	Gastrotropin	FABP6_HUMAN
	3.988	0.7975	1.85134	SEC14-like protein 2	O76054
	3.539	0.8849	1.84405	Nuclear receptor ROR-alpha	RORA_HUMAN
	4.313	0.3318	1.8106	Endothelial protein C receptor	EPCR_HUMAN
	3.919	0.6532	1.76937	Glutathione S-transferase A1	P08263
	3.791	0.9477	1.7564	Vitamin D-binding protein	VTDB_HUMAN
	3.654	0.7309	1.75121	Bile acid receptor	NR1H4_HUMAN
	3.808	0.6347	1.74212	Tyrosine-protein phosphatase non-receptor type 1	PTN1_HUMAN
	3.564	0.5939	1.73969	Renin	RENI_HUMAN
	3.96	0.66	1.6383	Glutathione-requiring prostaglandin D synthase	PTGD2_HUMAN
	4.403	0.4403	1.63523	Vitamin D3 receptor	VDR_HUMAN
	3.746	0.6243	1.62917	Tyrosine-protein kinase JAK3	JAK3_HUMAN
	3.8	0.6333	1.62486	Tyrosine-protein kinase ITK/TSK	Q08881
	3.783	0.6305	1.62461	Retinol-binding protein 4	RET4_HUMAN
	3.779	0.6298	1.56873	Dipeptidyl peptidase 4	DPP4_HUMAN
	3.763	0.5376	1.55817	Interleukin-2	IL2_HUMAN
	3.499	0.6998	1.53046	Steroid hormone receptor ERR1	P11474
	3.666	0.7333	1.51463	Calmodulin	CALM_HUMAN
	4.347	0.483	1.48764	Retinoic acid receptor beta	RARB_HUMAN
	3.861	0.5516	1.46058	Cytochrome P450 2C8	CP2C8_HUMAN
	3.685	0.7369	1.45024	Wiskott-Aldrich syndrome protein	WASP_HUMAN
	4.098	0.5854	1.43447	Sulfotransferase family cytosolic 2B member 1	O00204
	3.847	0.5496	1.42678	Protein kinase C theta type	KPCT_HUMAN
	3.766	0.538	1.41687	Tyrosine-protein kinase ZAP-70	ZAP70_HUMAN
	3.865	0.773	1.39999	Bile salt sulfotransferase	Q06520
	3.413	0.6826	1.37485	Glutathione S-transferase P	GSTP1_HUMAN
	4.246	0.386	1.37457	Phosphatidylcholine transfer protein	Q9UKL6
	4.573	0.4573	1.3686	Retinoic acid receptor RXR-beta	RXRB_HUMAN
	3.581	0.3979	1.36463	Phosphatidylinositol 3-kinase regulatory subunit alpha	P85A_HUMAN
	3.615	0.6024	1.35398	Histone deacetylase 8	HDAC8_HUMAN
	3.913	0.4891	1.29959	Ferrochelatase, mitochondrial	P22830
	3.585	0.7171	1.28065	Tyrosine-protein phosphatase non-receptor type 11	PTN11_HUMAN
	3.715	0.6191	1.25576	[Pyruvate dehydrogenase [lipoamide]] kinase isozyme 2, mitochondrial	PDK2_HUMAN
	3.538	0.7076	1.21576	Prothrombin	THRB_HUMAN
	4.556	0.6509	1.21107	Aldo-keto reductase family 1 member C3	AK1C3_HUMAN
	3.653	0.5219	1.18775	Insulin-like growth factor IA	P01343
	3.674	0.6123	1.18356	Trafficking protein particle complex subunit 3	O43617
	3.4	0.6799	1.17019	Methionine aminopeptidase 2	AMPM2_HUMAN
	3.541	0.5059	1.16716	72 kDa type IV collagenase	MMP2_HUMAN
	3.697	0.5282	1.15692	Lanosterol synthase	ERG7_HUMAN
	3.473	0.4341	1.15492	Heat shock protein HSP 90-beta	P08238
	3.56	0.5934	1.12377	Oxysterols receptor LXR-beta	NR1H2_HUMAN
	3.676	0.6127	1.05661	Adenosine kinase	P55263
	3.723	0.3385	1.00115	Caspase-1	CASP1_HUMAN
	3.652	0.4058	0.95358	Serine/threonine-protein phosphatase PP1-gamma catalytic subunit	P36873
	3.537	0.5896	0.943877	Hepatocyte growth factor receptor	MET_HUMAN
	3.545	0.4431	0.927678	3-hydroxy-3-methylglutaryl-coenzyme A reductase	HMDH_HUMAN
	3.76	0.5371	0.892347	Fatty acid-binding protein, heart	FABPH_HUMAN
	3.871	0.4839	0.858352	Histamine N-methyltransferase	P50135
	3.45	0.69	0.857593	Corticosteroid 11-beta-dehydrogenase isozyme 1	DHI1_HUMAN
	3.724	0.4655	0.852709	Peptidyl-prolyl cis-trans isomerase FKBP1A	FKB1A_HUMAN
	3.251	0.6502	0.825994	Aldo-keto reductase family 1 member C1	Q04828
hypoxanthine	3.026	0.5044	2.91592	Eosinophil cationic protein	P12724
	3.549	0.2957	2.14428	Hypoxanthine-guanine phosphoribosyltransferase	P00492
	3.074	0.4392	2.08675	Tryptophan 5-hydroxylase 1	TPH1_HUMAN
	3.277	0.3642	1.901	Leukocyte elastase	ELNE_HUMAN
	2.788	0.5575	1.83833	Glycogen synthase kinase-3 beta	GSK3B_HUMAN
	2.73	0.9099	1.72252	P-selectin	LYAM3_HUMAN
	2.698	0.8995	1.71452	Cholinesterase	CHLE_HUMAN
	2.812	0.4687	1.60748	Cyclin-A2	CCNA2_HUMAN
	2.825	0.5649	1.58028	Cell division protein kinase 2	P24941
	2.715	0.3878	1.50466	Tyrosine-protein phosphatase non-receptor type 1	PTN1_HUMAN
	2.848	0.4069	1.50309	Cathepsin S	CATS_HUMAN
	2.688	0.5375	1.44256	cAMP-dependent protein kinase catalytic subunit alpha	P00517
	2.968	0.3298	1.40584	Glutathione S-transferase A3	Q16772
	2.83	0.3144	1.3664	Glutathione S-transferase Mu 1	GSTM1_HUMAN
	2.68	0.536	1.07716	Mitogen-activated protein kinase 14	Q16539
	2.545	0.6362	1.06603	BAG family molecular chaperone regulator 1	BAG1_HUMAN
	2.656	0.5313	1.06392	Matrilysin	MMP7_HUMAN
	2.669	0.4448	1.03908	Stromelysin-1	MMP3_HUMAN
	2.714	0.2714	1.02378	Renin	RENI_HUMAN
	2.797	0.3496	0.921609	Ornithine aminotransferase, mitochondrial	OAT_HUMAN
	2.981	0.271	0.88028	Fibrinogen gamma chain	FIBG_HUMAN
	2.781	0.4635	0.808737	Proto-oncogene tyrosine-protein kinase Src	SRC_HUMAN
	2.676	0.3822	0.80746	Glutathione S-transferase theta-2	GSTT2_HUMAN
Glycerol, 1-hexadecyl ether	4.425	0.7375	3.10165	Trafficking protein particle complex subunit 3	O43617
	4.459	0.6371	3.03603	Cytochrome P450 2C8	CP2C8_HUMAN
	3.861	0.7722	2.77298	Methionine aminopeptidase 2	AMPM2_HUMAN
	4.174	0.8347	2.57189	SEC14-like protein 2	O76054
	3.717	0.9293	2.50013	Mitogen-activated protein kinase 14	Q16539
	3.895	0.6491	2.49885	Glutathione S-transferase P	GSTP1_HUMAN
	3.859	0.4288	2.40055	Phosphatidylinositol 3-kinase regulatory subunit alpha	P85A_HUMAN
	3.76	0.752	2.34252	Vascular endothelial growth factor receptor 2	P35968
	3.608	0.9019	2.3352	Nuclear receptor ROR-alpha	RORA_HUMAN
	4.184	0.3803	2.32074	Caspase-1	CASP1_HUMAN
	3.973	0.5676	2.31815	72 kDa type IV collagenase	MMP2_HUMAN
	3.836	0.7672	2.23067	Tyrosine-protein phosphatase non-receptor type 11	PTN11_HUMAN
	3.984	0.498	2.17015	Interleukin-2	IL2_HUMAN
	3.741	0.6236	2.14373	Alpha-1-antitrypsin	A1AT_HUMAN
	3.66	0.732	2.10186	Estradiol 17-beta-dehydrogenase 1	P14061
	4.274	0.3288	2.03969	Endothelial protein C receptor	EPCR_HUMAN
	3.797	0.7593	1.97547	Corticosteroid 11-beta-dehydrogenase isozyme 1	DHI1_HUMAN
	3.574	0.7147	1.94315	cAMP-dependent protein kinase catalytic subunit alpha	P00517
	3.741	0.7481	1.87693	Wiskott-Aldrich syndrome protein	WASP_HUMAN
	3.614	0.6023	1.84101	Flavin reductase	P30043
	3.447	0.8618	1.80302	Peroxisome proliferator-activated receptor gamma	PPARG_HUMAN
	3.892	0.6486	1.76274	Glutathione-requiring prostaglandin D synthase	PTGD2_HUMAN
	3.791	0.5415	1.74873	S-methyl-5-thioadenosine phosphorylase	Q13126
	3.711	0.5302	1.73517	Basic fibroblast growth factor receptor 1	FGFR1_HUMAN
	4.285	0.3896	1.71009	Phosphatidylcholine transfer protein	Q9UKL6
	3.657	0.9143	1.69625	Vitamin D-binding protein	VTDB_HUMAN
	3.926	0.5609	1.61555	Hepatocyte nuclear factor 4-gamma	Q14541
	3.409	0.5682	1.57917	Peroxisome proliferator-activated receptor delta	PPARD_HUMAN
	4.17	0.4633	1.45902	Retinoic acid receptor beta	RARB_HUMAN
	4.377	0.4863	1.4332	Dual specificity mitogen-activated protein kinase kinase 1	MP2K1_HUMAN
	3.352	0.6704	1.36716	Histone deacetylase 8	Q9BY41
	4.511	0.5638	1.31142	Retinol-binding protein 4	RET4_HUMAN
	3.482	0.6964	1.29184	Calmodulin	CALM_HUMAN
	3.386	0.6773	1.28673	Bile acid receptor	NR1H4_HUMAN
	3.315	0.4144	1.28402	Heme oxygenase 1	HMOX1_HUMAN
	3.352	0.8379	1.27983	ADAM 17	ADA17_HUMAN
	3.7	0.4111	1.2498	Growth factor receptor-bound protein 2	GRB2_HUMAN
	3.553	0.5922	1.24113	Proto-oncogene tyrosine-protein kinase LCK	LCK_HUMAN
	3.667	0.7334	1.22106	Bile salt sulfotransferase	Q06520
	3.557	0.5928	1.19787	Glutathione S-transferase A1	P08263
	3.485	0.5809	1.18211	Integrin alpha-L	ITAL_HUMAN
	3.695	0.6158	1.17938	Alcohol dehydrogenase class-3	ADHX_HUMAN
	3.62	0.6033	1.16787	Adenosine kinase	P55263
	3.779	0.4724	1.16145	Peptidyl-prolyl cis-trans isomerase FKBP1A	FKB1A_HUMAN
	3.71	0.4638	1.14903	Ferrochelatase, mitochondrial	P22830
	3.454	0.5756	1.14882	Tyrosine-protein kinase JAK3	JAK3_HUMAN
	4.227	0.4697	1.117	Cellular retinoic acid-binding protein 2	P29373
	3.432	0.4903	1.10464	Neutrophil gelatinase-associated lipocalin	NGAL_HUMAN
	3.282	0.547	1.08117	Insulin-like growth factor IA	P01343
	3.363	0.5605	1.0696	Peroxisome proliferator-activated receptor alpha	PPARA_HUMAN
	3.173	0.7933	1.04279	Coagulation factor X	FA10_HUMAN
	3.482	0.4974	1.01819	Tyrosine-protein kinase ZAP-70	ZAP70_HUMAN
	3.834	0.4792	0.977415	Dipeptidase 1	DPEP1_HUMAN
	3.147	0.6293	0.965272	cGMP-inhibited 3,5-cyclic phosphodiesterase B	PDE3B_HUMAN
	4.069	0.4069	0.907886	Retinoic acid receptor RXR-beta	RXRB_HUMAN
	3.662	0.5231	0.90129	Sulfotransferase family cytosolic 2B member 1	O00204
	2.999	0.9997	0.897436	Kinesin-like protein KIF11	KIF11_HUMAN
	3.741	0.5344	0.887525	Fatty acid-binding protein, brain	FABP7_HUMAN
	3.315	0.5525	0.876114	Protein-arginine deiminase type-4	PADI4_HUMAN
	3.314	0.5523	0.828101	Oxysterols receptor LXR-alpha	NR1H3_HUMAN
	3.446	0.4922	0.823546	Protein kinase C theta type	KPCT_HUMAN
	3.728	0.466	0.816695	Histamine N-methyltransferase	P50135
	2.978	0.9926	0.809761	Serum albumin	ALBU_HUMAN
	3.543	0.3937	0.801227	Transforming growth factor beta-2	TGFB2_HUMAN
L-isoleucine	3.546	0.7092	3.27437	Proto-oncogene tyrosine-protein kinase Src	SRC_HUMAN
	3.866	0.4832	3.18746	Ornithine aminotransferase, mitochondrial	OAT_HUMAN
	3.991	0.5702	2.98776	Cytochrome P450 2C9	CP2C9_HUMAN
	3.391	0.6781	2.71004	3-hydroxy-3-methylglutaryl-coenzyme A reductase	HMDH_HUMAN
	3.3	0.4715	2.37486	Histone-lysine N-methyltransferase SETD7	SETD7_HUMAN
	3.771	0.3428	2.36645	Phenylethanolamine N-methyltransferase	PNMT_HUMAN
	3.809	0.5442	2.32288	Arginase-1	ARGI1_HUMAN
	3.632	0.3632	1.87028	Caspase-3	CASP3_HUMAN
	3.453	0.4316	1.6311	Farnesyl pyrophosphate synthetase	FPPS_HUMAN
	2.947	0.7369	1.48411	Methionine aminopeptidase 2	AMPM2_HUMAN
	3.827	0.5468	1.47769	Aldo-keto reductase family 1 member C2	AK1C2_HUMAN
	2.952	0.7379	1.42899	Dual specificity protein phosphatase 6	DUS6_HUMAN
	2.903	0.5807	1.38234	Dipeptidyl peptidase 4	DPP4_HUMAN
	2.899	0.4832	1.35198	cAMP-dependent protein kinase catalytic subunit alpha	P00517
	2.933	0.7334	1.34765	Androgen receptor	ANDR_HUMAN
	2.852	0.9506	1.31773	Peptidyl-prolyl cis-trans isomerase A	P62937
	2.932	0.4886	1.29408	ADAM 17	ADA17_HUMAN
	2.943	0.5887	1.27473	Aldo-keto reductase family 1 member C3	AK1C3_HUMAN
	2.871	0.7178	1.25136	NONE	NONE
	2.921	0.4173	1.15545	Delta-aminolevulinic acid dehydratase	HEM2_HUMAN
	2.806	0.5613	1.13293	Baculoviral IAP repeat-containing protein 4	XIAP_HUMAN
	2.903	0.7256	1.05892	Glycine amidinotransferase, mitochondrial	GATM_HUMAN
	2.761	0.9203	1.04465	Peroxiredoxin-5, mitochondrial	PRDX5_HUMAN
	3.416	0.3416	1.04088	Retinoic acid receptor gamma	RARG_HUMAN
	2.759	0.6898	1.02875	Stromelysin-1	MMP3_HUMAN
	2.726	0.9088	1.01214	Amine oxidase [flavin-containing] B	AOFB_HUMAN
	2.813	0.5626	0.984699	Superoxide dismutase [Mn], mitochondrial	P04179
	2.832	0.4721	0.981618	Alpha-amylase 1	P04745
	2.852	0.5703	0.949624	Hepatocyte growth factor receptor	P08581
	2.737	0.6842	0.933316	Serine/threonine-protein kinase Chk1	CHK1_HUMAN
	2.82	0.7049	0.90767	Liver carboxylesterase 1	EST1_HUMAN
	2.899	0.4141	0.900478	cAMP-dependent protein kinase, alpha-catalytic subunit	P00517
	2.85	0.57	0.884543	Neutrophil collagenase	MMP8_HUMAN
	2.852	0.4753	0.866614	Prostatic acid phosphatase	PPAP_HUMAN
	2.803	0.5606	0.864449	Placenta growth factor	PLGF_HUMAN
	2.827	0.7067	0.848642	Branched-chain-amino-acid aminotransferase, mitochondrial	O15382
	3.41	0.8525	0.842377	Aldose reductase	ALDR_HUMAN
cholesterol	4.666	0.9332	3.31002	Mineralocorticoid receptor	MCR_HUMAN
	4.679	0.7799	2.85959	Glutathione-requiring prostaglandin D synthase	PTGD2_HUMAN
	4.283	0.7138	2.58784	Retinol-binding protein 4	RET4_HUMAN
	4.397	0.8794	2.56446	SEC14-like protein 2	O76054
	3.872	0.7743	2.3674	Cell division protein kinase 2	P24941
	3.688	0.922	2.18416	Nuclear receptor ROR-alpha	RORA_HUMAN
	3.752	0.7505	2.05638	cAMP-dependent protein kinase catalytic subunit alpha	P00517
	4.791	0.3686	2.04383	Serine/threonine-protein phosphatase PP1-gamma catalytic subunit	P36873
	3.921	0.4901	2.03478	Vitamin D3 receptor	VDR_HUMAN
	4.085	0.6808	1.92594	Trafficking protein particle complex subunit 3	O43617
	4.588	0.5736	1.90883	Basic fibroblast growth factor receptor 1	FGFR1_HUMAN
	4.082	0.5832	1.80491	Cytochrome P450 2C8	CP2C8_HUMAN
	4.383	0.6262	1.79224	Sulfotransferase family cytosolic 2B member 1	O00204
	3.693	0.7386	1.78047	Bile acid receptor	NR1H4_HUMAN
	3.597	0.5994	1.74029	Histo-blood group ABO system transferase	P16442
	4.001	0.5715	1.67371	Lanosterol synthase	ERG7_HUMAN
	4.228	0.5285	1.66538	Retinoic acid receptor gamma	RARG_HUMAN
	3.575	0.715	1.66135	Steroid hormone receptor ERR1	P11474
	3.544	0.7089	1.61932	Histone deacetylase 8	Q9BY41
	4.146	0.5182	1.61014	Ferrochelatase, mitochondrial	P22830
	4.209	0.5261	1.59716	Peptidyl-prolyl cis-trans isomerase FKBP1A	FKB1A_HUMAN
	3.847	0.4809	1.56305	Stromelysin-1	MMP3_HUMAN
	3.913	0.7826	1.51494	Estradiol 17-beta-dehydrogenase 1	P14061
	4.174	0.5962	1.51415	Gastrotropin	FABP6_HUMAN
	3.71	0.9274	1.46691	Vitamin D-binding protein	VTDB_HUMAN
	3.681	0.7362	1.45412	Tyrosine-protein phosphatase non-receptor type 11	PTN11_HUMAN
	3.606	0.601	1.29173	Oxysterols receptor LXR-alpha	NR1H3_HUMAN
	3.763	0.4704	1.29083	Interleukin-2	IL2_HUMAN
	3.497	0.5829	1.28736	Alpha-1-antitrypsin	A1AT_HUMAN
	3.533	0.7066	1.28531	Alpha-tocopherol transfer protein	P49638
	4.511	0.5012	1.27518	Dual specificity mitogen-activated protein kinase kinase 1	MP2K1_HUMAN
	3.366	0.5609	1.2514	Peroxisome proliferator-activated receptor delta	PPARD_HUMAN
	3.913	0.559	1.2513	Hepatocyte nuclear factor 4-gamma	Q14541
	3.702	0.617	1.23039	Glutathione S-transferase A1	P08263
	3.699	0.4624	1.1428	Proto-oncogene tyrosine-protein kinase ABL1	P00519
	3.591	0.7182	1.14078	Corticosteroid 11-beta-dehydrogenase isozyme 1	DHI1_HUMAN
	3.336	0.6671	1.13529	Glutathione S-transferase P	GSTP1_HUMAN
	3.502	0.7004	1.0612	Calmodulin	CALM_HUMAN
	3.531	0.5885	1.05826	Ephrin type-B receptor 4	EPHB4_HUMAN
	3.283	0.8208	1.04639	Collagenase 3	MMP13_HUMAN
	3.748	0.4165	1.04083	Growth factor receptor-bound protein 2	GRB2_HUMAN
	3.767	0.6278	1.02851	Alcohol dehydrogenase class-3	ADHX_HUMAN
	3.254	0.6508	0.988136	cAMP-specific 3,5-cyclic phosphodiesterase 4D	PDE4D_HUMAN
	3.27	0.5449	0.970641	Ganglioside GM2 activator	P17900
	3.394	0.4242	0.946529	Heat shock protein HSP 90-beta	P08238
	3.409	0.5682	0.940364	Receptor tyrosine-protein kinase erbB-4	ERBB4_HUMAN
	3.44	0.4914	0.937833	72 kDa type IV collagenase	MMP2_HUMAN
	3.725	0.4657	0.917652	Retinoic acid receptor alpha	RARA_HUMAN
	3.898	0.5569	0.885292	Fatty acid-binding protein, brain	FABP7_HUMAN
	3.616	0.6027	0.878272	Adenosine kinase	P55263
	3.735	0.7469	0.872764	S-methyl-5-thioadenosine phosphorylase	Q13126
	3.978	0.4972	0.861091	Glucocorticoid receptor	GCR_HUMAN
	3.454	0.6909	0.853046	Wiskott-Aldrich syndrome protein	WASP_HUMAN
	3.944	0.3586	0.818186	Phosphatidylcholine transfer protein	Q9UKL6
	3.497	0.4995	0.810809	Insulin-like growth factor IA	P01343
nicotinic acid	3.915	0.5593	3.25334	Arginase-1	ARGI1_HUMAN
	3.707	0.5295	3.03262	Cytochrome P450 2C9	CP2C9_HUMAN
	3.613	0.3284	2.21174	Trifunctional purine biosynthetic protein adenosine-3	PUR2_HUMAN
	2.948	0.5897	1.83478	Cyclin-A2	CCNA2_HUMAN
	2.89	0.4129	1.82602	Neutrophil collagenase	P22894
	3.64	0.455	1.66897	Insulin receptor	INSR_HUMAN
	2.901	0.4835	1.61312	Angiogenin	ANGI_HUMAN
	2.786	0.9287	1.60374	Carbonic anhydrase 2	CAH2_HUMAN
	2.885	0.4122	1.56414	Histone-lysine N-methyltransferase SETD7	SETD7_HUMAN
	2.731	0.9104	1.48708	Cholinesterase	CHLE_HUMAN
	2.905	0.3632	1.41816	Baculoviral IAP repeat-containing protein 7	Q96CA5
	2.827	0.7067	1.41776	Glycine amidinotransferase, mitochondrial	GATM_HUMAN
	2.927	0.4181	1.37139	Proto-oncogene tyrosine-protein kinase LCK	LCK_HUMAN
	2.724	0.5449	1.33155	3-phosphoinositide-dependent protein kinase 1	PDPK1_HUMAN
	3.127	0.3127	1.24775	Rho-related GTP-binding protein RhoE	P61587
	3.786	0.3786	1.21666	Neprilysin	NEP_HUMAN
	2.765	0.3949	1.19945	Delta-aminolevulinic acid dehydratase	HEM2_HUMAN
	2.979	0.3724	1.19375	Ornithine aminotransferase, mitochondrial	OAT_HUMAN
	2.8	0.3111	1.17233	Caspase-3	CASP3_HUMAN
	2.746	0.4577	1.15395	cGMP-specific 3,5-cyclic phosphodiesterase	PDE5A_HUMAN
	2.858	0.4763	1.12715	Protein-arginine deiminase type-4	PADI4_HUMAN
	2.679	0.6698	1.1113	NONE	NONE
	2.738	0.5476	1.06075	Phenylalanine-4-hydroxylase	PH4H_HUMAN
	2.593	0.6482	0.946	Heat shock protein HSP 90-alpha	HS90A_HUMAN
	2.655	0.4425	0.939168	Uridine 5-monophosphate synthase	P11172
	2.839	0.3549	0.928417	Matrix metalloproteinase-16	MMP16_HUMAN
	2.963	0.3703	0.893849	Retinoic acid receptor alpha	RARA_HUMAN
	2.83	0.4717	0.829158	Vascular endothelial growth factor receptor 2	VGFR2_HUMAN
	2.719	0.4532	0.816747	Tyrosine-protein phosphatase non-receptor type 1	PTN1_HUMAN
uracil	3.534	0.589	4.03624	Stromelysin-1	MMP3_HUMAN
	2.945	0.4908	1.84292	3-phosphoinositide-dependent protein kinase 1	PDPK1_HUMAN
	2.97	0.2284	1.75047	Amine oxidase [flavin-containing] B	AOFB_HUMAN
	2.764	0.4606	1.32133	NONE	NONE
	2.651	0.8837	1.22368	Carbonic anhydrase 12	CAH12_HUMAN
	2.805	0.3507	0.971236	Phenylalanine-4-hydroxylase	PH4H_HUMAN
	2.817	0.3521	0.830607	Cyclin-A2	CCNA2_HUMAN
phenylalanine	4.83	0.69	3.56269	Arginase-1	ARGI1_HUMAN
	3.955	0.4943	2.96403	Glutathione-requiring prostaglandin D synthase	PTGD2_HUMAN
	3.98	0.4975	2.90519	Glutathione S-transferase omega-1	GSTO1_HUMAN
	3.849	0.4277	2.84336	Glutathione S-transferase Mu 1	GSTM1_HUMAN
	3.817	0.4241	2.32043	Glutathione S-transferase A1	P08263
	4.636	0.6623	2.06619	Alcohol dehydrogenase class-3	ADHX_HUMAN
	3.794	0.4215	2.05672	Leukotriene A-4 hydrolase	LKHA4_HUMAN
	3.409	0.487	1.93613	Histone-lysine N-methyltransferase SETD7	SETD7_HUMAN
	3.27	0.654	1.91941	Phenylalanine-4-hydroxylase	PH4H_HUMAN
	3.348	0.8371	1.883	Glycine amidinotransferase, mitochondrial	GATM_HUMAN
	3.808	0.5439	1.79036	Cytochrome P450 2C9	CP2C9_HUMAN
	3.271	0.8178	1.69076	Kynurenine--oxoglutarate transaminase 1	KAT1_HUMAN
	3.748	0.4685	1.66596	Farnesyl pyrophosphate synthetase	FPPS_HUMAN
	3.821	0.6369	1.59307	Lactoylglutathione lyase	LGUL_HUMAN
	3.42	0.4276	1.45048	Matrix metalloproteinase-16	MMP16_HUMAN
	3.597	0.327	1.44962	Caspase-1	CASP1_HUMAN
	3.377	0.5629	1.35131	Proto-oncogene tyrosine-protein kinase LCK	LCK_HUMAN
	3.439	0.4299	1.26333	Ornithine aminotransferase, mitochondrial	OAT_HUMAN
	3.724	0.532	1.25646	Angiotensin-converting enzyme	ACE_HUMAN
	3.122	0.6244	1.24028	Ephrin type-B receptor 4	EPHB4_HUMAN
	3.68	0.46	1.09944	Dipeptidase 1	DPEP1_HUMAN
	3.123	0.3903	1.09716	Neprilysin	NEP_HUMAN
	2.974	0.7435	1.09504	Cell division protein kinase 2	P24941
	2.951	0.9836	1.0697	Alcohol dehydrogenase 1B	ADH1B_HUMAN
	2.999	0.5997	1.05251	Angiotensin-converting enzyme 2	ACE2_HUMAN
	2.965	0.5929	1.04395	Glucosylceramidase	GLCM_HUMAN
	2.956	0.739	0.999489	Vascular endothelial growth factor receptor 2	VGFR2_HUMAN
	2.92	0.9735	0.993224	Glutathione S-transferase P	GSTP1_HUMAN
	3.188	0.4554	0.979019	Serine/threonine-protein kinase 6	O14965
	2.899	0.9663	0.974407	NONE	NONE
	2.949	0.5897	0.967971	cAMP-dependent protein kinase catalytic subunit alpha	P00517
	2.869	0.9563	0.938811	Beta-secretase 1	BACE1_HUMAN
	2.987	0.5973	0.924757	Tyrosyl-tRNA synthetase, cytoplasmic	P54577
	2.916	0.729	0.922294	Serine/threonine-protein kinase Chk1	CHK1_HUMAN
	2.877	0.7192	0.920885	Stromelysin-1	MMP3_HUMAN
	2.916	0.486	0.920774	Baculoviral IAP repeat-containing protein 7	BIRC7_HUMAN
	2.924	0.7309	0.89365	Macrophage migration inhibitory factor	MIF_HUMAN
	3.717	0.9293	0.891509	Aldose reductase	ALDR_HUMAN
	2.949	0.7373	0.887806	Basic fibroblast growth factor receptor 1	FGFR1_HUMAN
	3.224	0.5373	0.887478	Prostatic acid phosphatase	PPAP_HUMAN
	2.918	0.7295	0.865333	Dipeptidyl peptidase 4	DPP4_HUMAN
	2.926	0.9753	0.838054	Trypsin-1	P07477
	2.899	0.5798	0.812093	Cytidine deaminase	CDD_HUMAN
	2.876	0.5752	0.80664	Macrophage metalloelastase	MMP12_HUMAN
valine	5.222	0.746	3.69816	Arginase-1	ARGI1_HUMAN
	3.787	0.9469	2.88962	Glycine amidinotransferase, mitochondrial	GATM_HUMAN
	5.781	0.4817	2.56942	Glutathione S-transferase P	GSTP1_HUMAN
	3.937	0.4921	2.55078	Glutathione-requiring prostaglandin D synthase	PTGD2_HUMAN
	3.739	0.4154	2.19835	Glutathione S-transferase Mu 1	GSTM1_HUMAN
	3.813	0.4766	2.16462	Glutathione S-transferase omega-1	GSTO1_HUMAN
	3.898	0.4872	2.07304	Ornithine aminotransferase, mitochondrial	OAT_HUMAN
	3.481	0.4973	2.02574	Baculoviral IAP repeat-containing protein 4	P98170
	3.765	0.4707	1.83028	Lysozyme C	P61626
	3.5	0.5	1.74695	Tyrosine-protein phosphatase non-receptor type 1	PTN1_HUMAN
	3.334	0.6669	1.56012	3-hydroxy-3-methylglutaryl-coenzyme A reductase	HMDH_HUMAN
	3.733	0.5332	1.39251	Cytochrome P450 2C9	CP2C9_HUMAN
	3.578	0.4473	1.28371	Matrix metalloproteinase-9	MMP9_HUMAN
	3.447	0.3831	1.26605	Glutathione S-transferase Mu 2	GSTM2_HUMAN
	3.831	0.4789	1.15674	Dipeptidase 1	DPEP1_HUMAN
	3.54	0.3934	1.15619	Glutathione S-transferase A3	Q16772
	3.886	0.4318	1.15434	Leukocyte elastase	ELNE_HUMAN
	3.355	0.2796	1.12436	Isovaleryl-CoA dehydrogenase, mitochondrial	P26440
	2.979	0.7447	1.02385	Dipeptidyl peptidase 4	DPP4_HUMAN
	2.963	0.7408	0.992359	Phenylalanine-4-hydroxylase	PH4H_HUMAN
	2.895	0.9651	0.978599	Ribonuclease UK114	P52758
	3.667	0.3667	0.958264	ADAM 33	ADA33_HUMAN
	2.992	0.7479	0.92024	Prothrombin	THRB_HUMAN
	2.863	0.9544	0.894675	Carbonic anhydrase 2	CAH2_HUMAN
	3.035	0.4335	0.861979	Delta-aminolevulinic acid dehydratase	HEM2_HUMAN
	2.987	0.5974	0.856563	Chloride intracellular channel protein 1	O00299
	2.968	0.371	0.844802	Glutathione S-transferase A1	P08263
	2.97	0.7425	0.838763	Coagulation factor VII	FA7_HUMAN
palmiticacid	4.693	0.6704	3.06916	Hepatocyte nuclear factor 4-gamma	Q14541
	4.365	0.485	2.64722	Growth factor receptor-bound protein 2	GRB2_HUMAN
	3.973	0.4415	2.57184	Phosphatidylinositol 3-kinase regulatory subunit alpha	P85A_HUMAN
	4.179	0.5971	2.29126	Cytochrome P450 2C8	CP2C8_HUMAN
	3.623	0.9057	2.25646	Nuclear receptor ROR-alpha	RORA_HUMAN
	3.82	0.6367	2.22198	Alpha-1-antitrypsin	A1AT_HUMAN
	3.812	0.953	2.19957	Kinesin-like protein KIF11	KIF11_HUMAN
	4.118	0.5883	2.18009	Lanosterol synthase	ERG7_HUMAN
	3.824	0.7648	2.06808	Tyrosine-protein phosphatase non-receptor type 11	PTN11_HUMAN
	4.348	0.3345	2.05826	Endothelial protein C receptor	EPCR_HUMAN
	3.522	0.8806	2.05435	Thymidylate synthase	TYSY_HUMAN
	4.522	0.5024	1.92204	Retinoic acid receptor beta	RARB_HUMAN
	3.797	0.4746	1.89273	Glutamate carboxypeptidase 2	FOLH1_HUMAN
	3.81	0.762	1.88762	Corticosteroid 11-beta-dehydrogenase isozyme 1	DHI1_HUMAN
	3.708	0.4635	1.86259	Heat shock protein HSP 90-beta	P08238
	3.632	0.6053	1.85987	Stromelysin-1	MMP3_HUMAN
	4.114	0.5877	1.81891	Cytochrome P450 2C9	CP2C9_HUMAN
	4.03	0.6717	1.79976	Alcohol dehydrogenase class-3	ADHX_HUMAN
	3.733	0.9333	1.78734	Vitamin D-binding protein	VTDB_HUMAN
	3.809	0.4761	1.72006	Proto-oncogene tyrosine-protein kinase ABL1	P00519
	3.507	0.5009	1.69834	Cathepsin S	CATS_HUMAN
	3.914	0.6523	1.67563	Estradiol 17-beta-dehydrogenase 1	P14061
	3.824	0.6373	1.64602	Trafficking protein particle complex subunit 3	O43617
	3.526	0.7052	1.57254	Bile acid receptor	NR1H4_HUMAN
	3.493	0.2687	1.55439	Amine oxidase [flavin-containing] A	AOFA_HUMAN
	4.208	0.3825	1.54866	Trifunctional purine biosynthetic protein adenosine-3	PUR2_HUMAN
	3.734	0.4149	1.49196	Glucocorticoid receptor	GCR_HUMAN
	3.97	0.4963	1.46409	Retinoic acid receptor gamma	RARG_HUMAN
	3.418	0.6836	1.46221	Steroid hormone receptor ERR1	P11474
	3.626	0.6044	1.43089	Integrin alpha-L	ITAL_HUMAN
	3.718	0.7437	1.4305	SEC14-like protein 2	O76054
	3.384	0.846	1.42268	Collagenase 3	MMP13_HUMAN
	4.181	0.3801	1.42245	Phosphatidylcholine transfer protein	Q9UKL6
	3.411	0.6822	1.38199	cAMP-dependent protein kinase catalytic subunit alpha	P00517
	3.521	0.5868	1.37444	Receptor tyrosine-protein kinase erbB-4	ERBB4_HUMAN
	3.524	0.4405	1.36991	Vitamin D3 receptor	VDR_HUMAN
	3.565	0.5094	1.33691	72 kDa type IV collagenase	MMP2_HUMAN
	3.364	0.8411	1.31659	Progesterone receptor	PRGR_HUMAN
	3.597	0.5995	1.2242	Histone deacetylase 8	HDAC8_HUMAN
	3.328	0.5546	1.19008	RAC-beta serine/threonine-protein kinase	AKT2_HUMAN
	3.806	0.7611	1.14908	S-methyl-5-thioadenosine phosphorylase	Q13126
	3.817	0.6362	1.09758	Lactoylglutathione lyase	LGUL_HUMAN
	3.931	0.4913	1.09014	Histamine N-methyltransferase	P50135
	3.211	0.8027	1.06624	Dihydroorotate dehydrogenase, mitochondrial	PYRD_HUMAN
	5.335	0.5335	1.06008	Cellular retinoic acid-binding protein 2	P29373
	3.669	0.5242	1.05753	Tyrosine-protein kinase HCK	HCK_HUMAN
	4.205	0.4205	1.01574	Retinoic acid receptor RXR-beta	RXRB_HUMAN
	3.226	0.6452	1.00637	Macrophage metalloelastase	MMP12_HUMAN
	3.511	0.5851	0.998289	Glutathione S-transferase A1	P08263
	4.327	0.5409	0.997374	Retinol-binding protein 4	RET4_HUMAN
	3.731	0.4664	0.986048	Peptidyl-prolyl cis-trans isomerase FKBP1A	FKB1A_HUMAN
	3.402	0.6805	0.98047	Calmodulin	CALM_HUMAN
	3.654	0.4568	0.964122	Ferrochelatase, mitochondrial	P22830
	3.406	0.4866	0.911325	Interleukin-2	IL2_HUMAN
	3.504	0.438	0.890899	Ornithine aminotransferase, mitochondrial	OAT_HUMAN
	3.397	0.5662	0.881299	Proto-oncogene tyrosine-protein kinase LCK	LCK_HUMAN
	3.395	0.679	0.866946	Wiskott-Aldrich syndrome protein	WASP_HUMAN
	3.728	0.4142	0.85987	Angiopoietin-1 receptor	TIE2_HUMAN
	3.195	0.639	0.857679	Neutrophil collagenase	MMP8_HUMAN
	3.762	0.5374	0.84172	Fatty acid-binding protein, brain	FABP7_HUMAN
	3.499	0.3888	0.840932	Leukotriene A-4 hydrolase	LKHA4_HUMAN
	3.829	0.3481	0.829398	Insulin receptor	INSR_HUMAN
	3.198	0.4569	0.806844	Glycogen phosphorylase, liver form	P06737
	2.976	0.7439	0.800239	Protein farnesyltransferase/geranylgeranyltransferase type-1 subunit alpha	FNTA_HUMAN
proline	4.753	0.679	3.81879	Arginase-1	ARGI1_HUMAN
	3.921	0.3565	1.37461	Glutathione S-transferase P	GSTP1_HUMAN
	2.93	0.4185	1.1664	Baculoviral IAP repeat-containing protein 4	P98170
	2.988	0.4268	1.14574	Histone-lysine N-methyltransferase SETD7	SETD7_HUMAN
	2.933	0.4889	0.981372	Eosinophil cationic protein	P12724
	2.835	0.7088	0.97605	Plasminogen	P00747
	2.893	0.7232	0.944084	Glycine amidinotransferase, mitochondrial	GATM_HUMAN
	2.882	0.4803	0.884293	Prostatic acid phosphatase	PPAP_HUMAN
	2.893	0.4133	0.870856	NONE	NONE
	2.861	0.4086	0.833524	Delta-aminolevulinic acid dehydratase	HEM2_HUMAN
	2.821	0.4702	0.826744	Baculoviral IAP repeat-containing protein 7	Q96CA5
	2.778	0.2526	0.806913	Histone-lysine N-methyltransferase SETD8	SETD8_HUMAN
Hirudinoidine A	3.453	0.5756	3.69823	Cell division protein kinase 2	P24941
	3.527	0.3919	2.26697	5(3)-deoxyribonucleotidase, mitochondrial	Q9NPB1
	3.227	0.4034	2.09985	GTPase HRas	RASH_HUMAN
	3.046	0.6092	2.07718	Catenin alpha-1	CTNA1_HUMAN
	2.953	0.7383	1.97998	cAMP-specific 3,5-cyclic phosphodiesterase 4D	PDE4D_HUMAN
	2.948	0.9825	1.91882	Triggering receptor expressed on myeloid cells 1	Q9NP99
	2.93	0.586	1.87905	Neuronal calcium sensor 1	NCS1_HUMAN
	2.85	0.4071	1.83179	Chitotriosidase-1	Q13231
	2.904	0.5807	1.78228	Carbonyl reductase [NADPH] 1	CBR1_HUMAN
	3.244	0.3604	1.73047	Histo-blood group ABO system transferase	P16442
	2.927	0.4181	1.68009	Hydroxyacylglutathione hydrolase, mitochondrial	Q16775
	3.425	0.3114	1.65214	Fibrinogen gamma chain	FIBG_HUMAN
	2.896	0.5793	1.60935	Cell division protein kinase 6	CDK6_HUMAN
	2.888	0.4814	1.52812	Serine/threonine-protein kinase Chk1	CHK1_HUMAN
	2.793	0.6982	1.52231	Angiogenin	ANGI_HUMAN
	2.813	0.5627	1.49031	Urokinase-type plasminogen activator	UROK_HUMAN
	2.822	0.5644	1.4261	Heat shock protein HSP 90-alpha	HS90A_HUMAN
	2.772	0.462	1.423	ADP-ribosyl cyclase 2	BST1_HUMAN
	2.802	0.5603	1.40546	Neutrophil collagenase	MMP8_HUMAN
	2.932	0.4886	1.37444	Cytochrome P450 2C9	CP2C9_HUMAN
	3.409	0.284	1.3654	Tyrosine-protein kinase BTK	BTK_HUMAN
	2.953	0.3691	1.34018	Cell division protein kinase 7	P50613
	2.773	0.6933	1.32301	Macrophage migration inhibitory factor	MIF_HUMAN
	2.804	0.2804	1.29447	L-xylulose reductase	Q7Z4W1
	2.796	0.5592	1.25497	Ribonuclease 4	P34096
	2.837	0.4728	1.23045	Eosinophil cationic protein	P12724
	2.814	0.5628	1.2043	Phenylalanine-4-hydroxylase	PH4H_HUMAN
	2.739	0.4565	1.18783	Prothrombin	THRB_HUMAN
	2.772	0.3465	1.18683	Glutathione S-transferase A1	P08263
	2.947	0.4211	1.16872	Vascular endothelial growth factor receptor 2	VGFR2_HUMAN
	2.898	0.414	1.15192	Glutathione S-transferase theta-2	GSTT2_HUMAN
	2.773	0.2133	1.11898	Pancreatic alpha-amylase	AMYP_HUMAN
	2.772	0.462	1.11235	Galectin-2	LEG2_HUMAN
	2.882	0.3603	1.09131	Peptidyl-prolyl cis-trans isomerase FKBP1A	FKB1A_HUMAN
	2.757	0.3446	1.04602	cAMP-dependent protein kinase catalytic subunit alpha	P00517
	2.767	0.4612	1.04025	Dihydrofolate reductase	DYR_HUMAN
	2.842	0.4059	1.0159	Phospholipase A2, membrane associated	P14555
	2.826	0.4037	1.01032	Pleckstrin homology domain-containing family A member 4	Q9H4M7
	2.915	0.3239	0.906989	Lactoylglutathione lyase	LGUL_HUMAN
	2.891	0.3614	0.904894	Thymidylate kinase	KTHY_HUMAN
	2.987	0.3319	0.902875	Glutathione S-transferase A3	Q16772
	2.834	0.4724	0.89787	cAMP-specific 3,5-cyclic phosphodiesterase 4B	PDE4B_HUMAN
	2.8	0.4667	0.894932	Dihydroorotate dehydrogenase, mitochondrial	PYRD_HUMAN
	2.848	0.356	0.883002	Glutathione-requiring prostaglandin D synthase	PTGD2_HUMAN
	2.603	0.8676	0.876498	Glucosylceramidase	GLCM_HUMAN
	2.894	0.3215	0.867941	Glutathione S-transferase Mu 2	GSTM2_HUMAN
	2.729	0.3899	0.866737	Beta-secretase 1	BACE1_HUMAN
	2.619	0.873	0.808797	Peptidyl-prolyl cis-trans isomerase A	P62937
Hirudinoidine B	3.423	0.6847	3.3	Catenin alpha-1	CTNA1_HUMAN
	3.272	0.4674	3.18194	ADP-ribosyl cyclase 2	BST1_HUMAN
	3.328	0.4754	2.92956	Thymidine kinase, cytosolic	P04183
	3.373	0.4819	2.90343	Nicotinamide mononucleotide adenylyltransferase 1	Q9HAN9
	3.461	0.3846	2.80349	Glutathione S-transferase Mu 2	GSTM2_HUMAN
	3.626	0.518	2.71171	Tyrosine-protein kinase HCK	HCK_HUMAN
	3.931	0.3276	2.61573	Riboflavin kinase	Q969G6
	3.53	0.3922	2.11809	5(3)-deoxyribonucleotidase, mitochondrial	Q9NPB1
	2.993	0.9976	1.95041	Triggering receptor expressed on myeloid cells 1	Q9NP99
	3.327	0.3696	1.85838	Histo-blood group ABO system transferase	P16442
	3.149	0.3498	1.85715	Baculoviral IAP repeat-containing protein 7	Q96CA5
	2.953	0.7383	1.85443	cAMP-specific 3,5-cyclic phosphodiesterase 4D	PDE4D_HUMAN
	2.937	0.7341	1.85107	Casein kinase I isoform gamma-2	KC1G2_HUMAN
	2.94	0.588	1.80272	Neuronal calcium sensor 1	NCS1_HUMAN
	2.891	0.9636	1.79638	Epidermal growth factor receptor	EGFR_HUMAN
	2.917	0.7292	1.76366	S-methyl-5-thioadenosine phosphorylase	Q13126
	2.902	0.5804	1.73381	3-hydroxy-3-methylglutaryl-coenzyme A reductase	HMDH_HUMAN
	2.854	0.4077	1.71263	Chitotriosidase-1	Q13231
	2.924	0.731	1.67613	Heat shock protein HSP 90-alpha	HS90A_HUMAN
	2.917	0.2917	1.65627	L-xylulose reductase	Q7Z4W1
	2.947	0.5894	1.65484	Ephrin type-B receptor 4	EPHB4_HUMAN
	2.904	0.5808	1.65285	Carbonyl reductase [NADPH] 1	CBR1_HUMAN
	3.163	0.3954	1.63132	Ornithine carbamoyltransferase, mitochondrial	P00480
	2.924	0.4874	1.60943	Dihydrofolate reductase	DYR_HUMAN
	2.864	0.7159	1.51903	Serine/threonine-protein kinase Chk1	CHK1_HUMAN
	2.922	0.4174	1.50595	Hydroxyacylglutathione hydrolase, mitochondrial	Q16775
	2.896	0.5793	1.49994	Cell division protein kinase 6	CDK6_HUMAN
	2.848	0.5696	1.48311	Glycogen synthase kinase-3 beta	GSK3B_HUMAN
	2.789	0.9298	1.41961	Purine nucleoside phosphorylase	PNPH_HUMAN
	2.848	0.5696	1.41094	GTP-binding protein Rheb	Q15382
	2.817	0.5634	1.36932	Urokinase-type plasminogen activator	UROK_HUMAN
	3.259	0.2963	1.36578	Phenylethanolamine N-methyltransferase	PNMT_HUMAN
	2.812	0.9375	1.35248	NONE	NONE
	2.785	0.6961	1.33552	Angiogenin	ANGI_HUMAN
	2.954	0.422	1.33306	Phospholipase A2, membrane associated	P14555
	2.804	0.5608	1.29575	Neutrophil collagenase	MMP8_HUMAN
	3.426	0.2855	1.28772	Tyrosine-protein kinase BTK	BTK_HUMAN
	2.829	0.5659	1.26972	Ribonuclease 4	P34096
	2.931	0.4886	1.24862	Cytochrome P450 2C9	CP2C9_HUMAN
	2.883	0.5766	1.22541	Poly [ADP-ribose] polymerase 1	P09874
	2.848	0.5696	1.22339	Phenylalanine-4-hydroxylase	PH4H_HUMAN
	2.805	0.4007	1.21712	GTPase HRas	RASH_HUMAN
	2.956	0.3695	1.21642	Cell division protein kinase 7	P50613
	2.764	0.6911	1.18614	Macrophage migration inhibitory factor	MIF_HUMAN
	2.903	0.3226	1.17814	Histone acetyltransferase PCAF	Q92831
	2.708	0.9027	1.14597	Carbonic anhydrase 1	CAH1_HUMAN
	2.837	0.4728	1.09231	Eosinophil cationic protein	P12724
	2.764	0.4607	1.02047	Rho GTPase-activating protein 1	Q07960
	2.758	0.3447	1.01358	Glutathione S-transferase A1	P08263
	2.973	0.4248	1.00307	Tryptophan 5-hydroxylase 1	TPH1_HUMAN
	2.888	0.4126	0.994849	Glutathione S-transferase theta-2	GSTT2_HUMAN
	2.891	0.5782	0.98437	Sorbitol dehydrogenase	DHSO_HUMAN
	2.883	0.3603	0.976958	Peptidyl-prolyl cis-trans isomerase FKBP1A	FKB1A_HUMAN
	2.764	0.4606	0.972738	Galectin-2	LEG2_HUMAN
	2.675	0.8918	0.941243	Peptidyl-prolyl cis-trans isomerase A	P62937
	2.697	0.6742	0.906844	Group 10 secretory phospholipase A2	O15496
	2.832	0.4046	0.887951	Ephrin type-A receptor 2	EPHA2_HUMAN
	2.616	0.8719	0.877879	cAMP-specific 3,5-cyclic phosphodiesterase 4B	PDE4B_HUMAN
	2.609	0.8697	0.858152	Carbonic anhydrase 12	CAH12_HUMAN
	2.819	0.4027	0.849745	Pleckstrin homology domain-containing family A member 4	Q9H4M7
	2.814	0.469	0.837771	Dihydroorotate dehydrogenase, mitochondrial	PYRD_HUMAN
	3	0.3333	0.828372	Glutathione S-transferase A3	Q16772
	2.923	0.3248	0.823591	Lactoylglutathione lyase	LGUL_HUMAN
	2.65	0.4416	0.820115	Heat shock cognate 71 kDa protein	P11142
	3.008	0.3008	0.819888	Histamine N-methyltransferase	P50135
	2.891	0.3614	0.813329	Interstitial collagenase	P03956
Hirudinoidine C	3.927	0.6545	3.92533	Aldose reductase	ALDR_HUMAN
	3.821	0.5458	3.77264	Thymidine kinase, cytosolic	P04183
	3.601	0.6002	3.3272	Uridine 5-monophosphate synthase	P11172
	3.344	0.6689	3.19685	Cytidine deaminase	CDD_HUMAN
	3.706	0.5294	2.95414	Vascular endothelial growth factor receptor 2	VGFR2_HUMAN
	3.573	0.5104	2.89384	Nicotinamide mononucleotide adenylyltransferase 1	Q9HAN9
	3.523	0.5872	2.86117	Stromelysin-1	MMP3_HUMAN
	3.64	0.4045	2.85127	Thymidylate kinase	KTHY_HUMAN
	3.467	0.8668	2.82131	Cell division protein kinase 2	P24941
	3.94	0.3284	2.5903	UDP-N-acetylhexosamine pyrophosphorylase	Q16222
	3.405	0.681	2.5899	Catenin alpha-1	CTNA1_HUMAN
	3.653	0.5218	2.14802	Tyrosine-protein kinase HCK	HCK_HUMAN
	3.131	0.6262	2.08108	Phenylalanine-4-hydroxylase	PH4H_HUMAN
	3.93	0.3275	2.00371	Riboflavin kinase	Q969G6
	3.198	0.6395	1.92066	Mitogen-activated protein kinase 8	P45983
	3.357	0.373	1.80185	Glutathione S-transferase Mu 2	GSTM2_HUMAN
	3.757	0.3757	1.76002	Deoxyuridine 5-triphosphate nucleotidohydrolase, mitochondrial	DUT_HUMAN
	3.063	0.6127	1.75927	Carbonyl reductase [NADPH] 1	CBR1_HUMAN
	3.654	0.4567	1.74781	Glucokinase	HXK4_HUMAN
	3.048	0.762	1.72601	cAMP-specific 3,5-cyclic phosphodiesterase 4D	PDE4D_HUMAN
	3.06	0.7651	1.72498	Serine/threonine-protein kinase Chk1	CHK1_HUMAN
	3.704	0.3367	1.67646	Fibrinogen gamma chain	FIBG_HUMAN
	3.538	0.3216	1.60429	Phenylethanolamine N-methyltransferase	PNMT_HUMAN
	3.388	0.3765	1.53147	Glutathione S-transferase A3	Q16772
	2.961	0.5922	1.4735	3-hydroxy-3-methylglutaryl-coenzyme A reductase	HMDH_HUMAN
	2.955	0.5909	1.47112	Neuronal calcium sensor 1	NCS1_HUMAN
	3.502	0.3891	1.45759	5(3)-deoxyribonucleotidase, mitochondrial	Q9NPB1
	3.37	0.337	1.44125	Histamine N-methyltransferase	P50135
	2.923	0.7308	1.42099	Casein kinase I isoform gamma-2	KC1G2_HUMAN
	2.936	0.7339	1.39921	Purine nucleoside phosphorylase	PNPH_HUMAN
	3.098	0.4425	1.36056	Phospholipase A2, membrane associated	P14555
	2.867	0.9555	1.35645	Glucosylceramidase	GLCM_HUMAN
	2.968	0.5936	1.34134	Cell division protein kinase 6	CDK6_HUMAN
	2.907	0.5814	1.33253	Urokinase-type plasminogen activator	UROK_HUMAN
	2.931	0.5862	1.31154	Neutrophil collagenase	MMP8_HUMAN
	3.17	0.3963	1.29708	GTPase HRas	RASH_HUMAN
	2.851	0.4073	1.24455	Chitotriosidase-1	Q13231
	2.848	0.9492	1.2327	Triggering receptor expressed on myeloid cells 1	Q9NP99
	2.942	0.4903	1.22238	Coagulation factor X	FA10_HUMAN
	2.948	0.5895	1.21812	Ephrin type-B receptor 4	EPHB4_HUMAN
	2.929	0.2929	1.21601	L-xylulose reductase	Q7Z4W1
	2.897	0.7243	1.2126	Group 10 secretory phospholipase A2	O15496
	2.959	0.4932	1.18233	Thymidylate synthase	TYSY_HUMAN
	2.852	0.5704	1.09745	GTP-binding protein Rheb	Q15382
	2.855	0.571	1.09466	Glycogen synthase kinase-3 beta	GSK3B_HUMAN
	2.824	0.4707	1.0919	ADP-ribosyl cyclase 2	BST1_HUMAN
	3.098	0.3873	1.0889	Proto-oncogene tyrosine-protein kinase ABL1	P00519
	2.832	0.7081	1.08753	S-methyl-5-thioadenosine phosphorylase	Q13126
	2.803	0.9344	1.05697	NONE	NONE
	2.768	0.9228	1.05281	Carbonic anhydrase 2	CAH2_HUMAN
	2.934	0.4191	1.04227	Hydroxyacylglutathione hydrolase, mitochondrial	Q16775
	2.891	0.5783	1.0232	Macrophage metalloelastase	MMP12_HUMAN
	2.756	0.5512	0.948738	Tyrosine-protein phosphatase non-receptor type 1	PTN1_HUMAN
	2.812	0.4687	0.944803	cAMP-dependent protein kinase catalytic subunit alpha	P00517
	2.906	0.5812	0.895275	Poly [ADP-ribose] polymerase 1	P09874
	2.947	0.4911	0.884454	Cytochrome P450 2C9	CP2C9_HUMAN
	3.132	0.348	0.877541	Histo-blood group ABO system transferase	P16442
	2.684	0.8948	0.842993	Carbonic anhydrase 12	CAH12_HUMAN
	2.846	0.4066	0.835803	Arginase-2, mitochondrial	ARGI2_HUMAN
	3.28	0.2343	0.831972	NAD-dependent deacetylase sirtuin-5	SIRT5_HUMAN
	2.688	0.8959	0.815739	Carbonic anhydrase 1	CAH1_HUMAN
	2.738	0.5475	0.802621	3-phosphoinositide-dependent protein kinase 1	PDPK1_HUMAN
	2.913	0.5826	0.800764	Interferon-stimulated gene 20 kDa protein	ISG20_HUMAN
	2.747	0.6867	0.800693	Macrophage migration inhibitory factor	MIF_HUMAN
