# Supplementary material for: Combined systems pharmacology and fecal metabonomics to study the biomarkers and therapeutic mechanism of type 2 diabetic nephropathy treated withAstragalusand Leech
Source: Royal Society of Chemistry journal article supplement (doi:10.1039/c8ra04358b), 2018-01-01
Supplement: c8ra04358b3.xlsx [file c8ra04358b3.xlsx]

## Sheet: Sheet1
Table S3 Target proteins’ corresponding pathways predicted by KEGG database
hsa01100 Metabolic pathways - Homo sapiens (human) (42)
hsa05200 Pathways in cancer - Homo sapiens (human) (9)
hsa04010 MAPK signaling pathway - Homo sapiens (human) (8)
hsa04151 PI3K-Akt signaling pathway - Homo sapiens (human) (7)
hsa04014 Ras signaling pathway - Homo sapiens (human) (7)
hsa00230 Purine metabolism - Homo sapiens (human) (6)
hsa05418 Fluid shear stress and atherosclerosis - Homo sapiens (human) (6)
hsa00620 Pyruvate metabolism - Homo sapiens (human) (5)
hsa00270 Cysteine and methionine metabolism - Homo sapiens (human) (5)
hsa04510 Focal adhesion - Homo sapiens (human) (5)
hsa00980 Metabolism of xenobiotics by cytochrome P450 - Homo sapiens (human) (5)
hsa00983 Drug metabolism - other enzymes - Homo sapiens (human) (5)
hsa04068 FoxO signaling pathway - Homo sapiens (human) (5)
hsa05205 Proteoglycans in cancer - Homo sapiens (human) (5)
hsa04910 Insulin signaling pathway - Homo sapiens (human) (5)
hsa01521 EGFR tyrosine kinase inhibitor resistance - Homo sapiens (human) (4)
hsa04728 Dopaminergic synapse - Homo sapiens (human) (4)
hsa04914 Progesterone-mediated oocyte maturation - Homo sapiens (human) (4)
hsa00280 Valine, leucine and isoleucine degradation - Homo sapiens (human) (4)
hsa04972 Pancreatic secretion - Homo sapiens (human) (4)
hsa04218 Cellular senescence - Homo sapiens (human) (4)
hsa04722 Neurotrophin signaling pathway - Homo sapiens (human) (4)
hsa04922 Glucagon signaling pathway - Homo sapiens (human) (4)
hsa04931 Insulin resistance - Homo sapiens (human) (4)
hsa05204 Chemical carcinogenesis - Homo sapiens (human) (4)
hsa05168 Herpes simplex infection - Homo sapiens (human) (4)
hsa00240 Pyrimidine metabolism - Homo sapiens (human) (4)
hsa05164 Influenza A - Homo sapiens (human) (4)
hsa05203 Viral carcinogenesis - Homo sapiens (human) (4)
hsa05169 Epstein-Barr virus infection - Homo sapiens (human) (4)
hsa04217 Necroptosis - Homo sapiens (human) (4)
hsa00760 Nicotinate and nicotinamide metabolism - Homo sapiens (human) (4)
hsa00071 Fatty acid degradation - Homo sapiens (human) (4)
hsa00010 Glycolysis / Gluconeogenesis - Homo sapiens (human) (4)
hsa05225 Hepatocellular carcinoma - Homo sapiens (human) (4)
hsa04015 Rap1 signaling pathway - Homo sapiens (human) (4)
hsa04750 Inflammatory mediator regulation of TRP channels - Homo sapiens (human) (3)
hsa05162 Measles - Homo sapiens (human) (3)
hsa05167 Kaposi's sarcoma-associated herpesvirus infection - Homo sapiens (human) (3)
hsa05131 Shigellosis - Homo sapiens (human) (3)
hsa04657 IL-17 signaling pathway - Homo sapiens (human) (3)
hsa04060 Cytokine-cytokine receptor interaction - Homo sapiens (human) (3)
hsa00380 Tryptophan metabolism - Homo sapiens (human) (3)
hsa05226 Gastric cancer - Homo sapiens (human) (3)
hsa00982 Drug metabolism - cytochrome P450 - Homo sapiens (human) (3)
hsa04933 AGE-RAGE signaling pathway in diabetic complications - Homo sapiens (human) (3)
hsa05120 Epithelial cell signaling in Helicobacter pylori infection - Homo sapiens (human) (3)
hsa04110 Cell cycle - Homo sapiens (human) (3)
hsa05145 Toxoplasmosis - Homo sapiens (human) (3)
hsa05206 MicroRNAs in cancer - Homo sapiens (human) (3)
hsa04370 VEGF signaling pathway - Homo sapiens (human) (3)
hsa00140 Steroid hormone biosynthesis - Homo sapiens (human) (3)
hsa00310 Lysine degradation - Homo sapiens (human) (3)
hsa04270 Vascular smooth muscle contraction - Homo sapiens (human) (3)
hsa01200 Carbon metabolism - Homo sapiens (human) (3)
hsa04621 NOD-like receptor signaling pathway - Homo sapiens (human) (3)
hsa04659 Th17 cell differentiation - Homo sapiens (human) (3)
hsa00480 Glutathione metabolism - Homo sapiens (human) (3)
hsa04612 Antigen processing and presentation - Homo sapiens (human) (3)
hsa01230 Biosynthesis of amino acids - Homo sapiens (human) (3)
hsa04141 Protein processing in endoplasmic reticulum - Homo sapiens (human) (3)
hsa04071 Sphingolipid signaling pathway - Homo sapiens (human) (2)
hsa04664 Fc epsilon RI signaling pathway - Homo sapiens (human) (2)
hsa00260 Glycine, serine and threonine metabolism - Homo sapiens (human) (2)
hsa04976 Bile secretion - Homo sapiens (human) (2)
hsa01522 Endocrine resistance - Homo sapiens (human) (2)
hsa04660 T cell receptor signaling pathway - Homo sapiens (human) (2)
hsa00564 Glycerophospholipid metabolism - Homo sapiens (human) (2)
hsa00590 Arachidonic acid metabolism - Homo sapiens (human) (2)
hsa01524 Platinum drug resistance - Homo sapiens (human) (2)
hsa05160 Hepatitis C - Homo sapiens (human) (2)
hsa04917 Prolactin signaling pathway - Homo sapiens (human) (2)
hsa04658 Th1 and Th2 cell differentiation - Homo sapiens (human) (2)
hsa04670 Leukocyte transendothelial migration - Homo sapiens (human) (2)
hsa03040 Spliceosome - Homo sapiens (human) (2)
hsa00640 Propanoate metabolism - Homo sapiens (human) (2)
hsa03015 mRNA surveillance pathway - Homo sapiens (human) (2)
hsa05218 Melanoma - Homo sapiens (human) (2)
hsa04970 Salivary secretion - Homo sapiens (human) (2)
hsa04915 Estrogen signaling pathway - Homo sapiens (human) (2)
hsa04964 Proximal tubule bicarbonate reclamation - Homo sapiens (human) (2)
hsa04261 Adrenergic signaling in cardiomyocytes - Homo sapiens (human) (2)
hsa01212 Fatty acid metabolism - Homo sapiens (human) (2)
hsa05165 Human papillomavirus infection - Homo sapiens (human) (2)
hsa05161 Hepatitis B - Homo sapiens (human) (2)
hsa04144 Endocytosis - Homo sapiens (human) (2)
hsa00592 alpha-Linolenic acid metabolism - Homo sapiens (human) (2)
hsa04622 RIG-I-like receptor signaling pathway - Homo sapiens (human) (2)
hsa05211 Renal cell carcinoma - Homo sapiens (human) (2)
hsa05152 Tuberculosis - Homo sapiens (human) (2)
hsa04668 TNF signaling pathway - Homo sapiens (human) (2)
hsa05133 Pertussis - Homo sapiens (human) (2)
hsa00970 Aminoacyl-tRNA biosynthesis - Homo sapiens (human) (2)
hsa05142 Chagas disease (American trypanosomiasis) - Homo sapiens (human) (2)
hsa04926 Relaxin signaling pathway - Homo sapiens (human) (2)
hsa04012 ErbB signaling pathway - Homo sapiens (human) (2)
hsa05230 Central carbon metabolism in cancer - Homo sapiens (human) (2)
hsa04380 Osteoclast differentiation - Homo sapiens (human) (2)
hsa04114 Oocyte meiosis - Homo sapiens (human) (2)
hsa04723 Retrograde endocannabinoid signaling - Homo sapiens (human) (2)
hsa00770 Pantothenate and CoA biosynthesis - Homo sapiens (human) (2)
hsa00740 Riboflavin metabolism - Homo sapiens (human) (2)
hsa04211 Longevity regulating pathway - Homo sapiens (human) (2)
hsa05215 Prostate cancer - Homo sapiens (human) (2)
hsa00020 Citrate cycle (TCA cycle) - Homo sapiens (human) (2)
hsa00565 Ether lipid metabolism - Homo sapiens (human) (2)
hsa04919 Thyroid hormone signaling pathway - Homo sapiens (human) (2)
hsa05132 Salmonella infection - Homo sapiens (human) (2)
hsa04066 HIF-1 signaling pathway - Homo sapiens (human) (2)
hsa04360 Axon guidance - Homo sapiens (human) (2)
hsa05034 Alcoholism - Homo sapiens (human) (2)
hsa03013 RNA transport - Homo sapiens (human) (2)
hsa04213 Longevity regulating pathway - multiple species - Homo sapiens (human) (2)
hsa00290 Valine, leucine and isoleucine biosynthesis - Homo sapiens (human) (2)
hsa05144 Malaria - Homo sapiens (human) (2)
hsa00500 Starch and sucrose metabolism - Homo sapiens (human) (2)
hsa04912 GnRH signaling pathway - Homo sapiens (human) (2)
hsa04920 Adipocytokine signaling pathway - Homo sapiens (human) (2)
hsa00860 Porphyrin and chlorophyll metabolism - Homo sapiens (human) (2)
hsa00650 Butanoate metabolism - Homo sapiens (human) (2)
hsa00350 Tyrosine metabolism - Homo sapiens (human) (2)
hsa04975 Fat digestion and absorption - Homo sapiens (human) (2)
hsa00520 Amino sugar and nucleotide sugar metabolism - Homo sapiens (human) (2)
hsa04620 Toll-like receptor signaling pathway - Homo sapiens (human) (2)
hsa04024 cAMP signaling pathway - Homo sapiens (human) (2)
hsa04611 Platelet activation - Homo sapiens (human) (2)
hsa00591 Linoleic acid metabolism - Homo sapiens (human) (2)
hsa00900 Terpenoid backbone biosynthesis - Homo sapiens (human) (1)
hsa05140 Leishmaniasis - Homo sapiens (human) (1)
hsa04070 Phosphatidylinositol signaling system - Homo sapiens (human) (1)
hsa04080 Neuroactive ligand-receptor interaction - Homo sapiens (human) (1)
hsa00601 Glycosphingolipid biosynthesis - lacto and neolacto series - Homo sapiens (human) (1)
hsa05016 Huntington's disease - Homo sapiens (human) (1)
hsa00062 Fatty acid elongation - Homo sapiens (human) (1)
hsa05202 Transcriptional misregulation in cancer - Homo sapiens (human) (1)
hsa00040 Pentose and glucuronate interconversions - Homo sapiens (human) (1)
hsa05134 Legionellosis - Homo sapiens (human) (1)
hsa00450 Selenocompound metabolism - Homo sapiens (human) (1)
hsa00920 Sulfur metabolism - Homo sapiens (human) (1)
hsa00340 Histidine metabolism - Homo sapiens (human) (1)
hsa04020 Calcium signaling pathway - Homo sapiens (human) (1)
hsa00730 Thiamine metabolism - Homo sapiens (human) (1)
hsa05031 Amphetamine addiction - Homo sapiens (human) (1)
hsa05322 Systemic lupus erythematosus - Homo sapiens (human) (1)
hsa04062 Chemokine signaling pathway - Homo sapiens (human) (1)
hsa04971 Gastric acid secretion - Homo sapiens (human) (1)
hsa05010 Alzheimer's disease - Homo sapiens (human) (1)
hsa04215 Apoptosis - multiple species - Homo sapiens (human) (1)
hsa04330 Notch signaling pathway - Homo sapiens (human) (1)
hsa04310 Wnt signaling pathway - Homo sapiens (human) (1)
hsa05310 Asthma - Homo sapiens (human) (1)
hsa04913 Ovarian steroidogenesis - Homo sapiens (human) (1)
hsa04921 Oxytocin signaling pathway - Homo sapiens (human) (1)
hsa01210 2-Oxocarboxylic acid metabolism - Homo sapiens (human) (1)
hsa04974 Protein digestion and absorption - Homo sapiens (human) (1)
hsa00562 Inositol phosphate metabolism - Homo sapiens (human) (1)
hsa00670 One carbon pool by folate - Homo sapiens (human) (1)
hsa04390 Hippo signaling pathway - Homo sapiens (human) (1)
hsa05221 Acute myeloid leukemia - Homo sapiens (human) (1)
hsa04932 Non-alcoholic fatty liver disease (NAFLD) - Homo sapiens (human) (1)
hsa04210 Apoptosis - Homo sapiens (human) (1)
hsa04610 Complement and coagulation cascades - Homo sapiens (human) (1)
hsa02010 ABC transporters - Homo sapiens (human) (1)
hsa05130 Pathogenic Escherichia coli infection - Homo sapiens (human) (1)
hsa00790 Folate biosynthesis - Homo sapiens (human) (1)
hsa04630 Jak-STAT signaling pathway - Homo sapiens (human) (1)
hsa04530 Tight junction - Homo sapiens (human) (1)
hsa00630 Glyoxylate and dicarboxylate metabolism - Homo sapiens (human) (1)
hsa05166 HTLV-I infection - Homo sapiens (human) (1)
hsa04930 Type II diabetes mellitus - Homo sapiens (human) (1)
hsa04137 Mitophagy - animal - Homo sapiens (human) (1)
hsa04140 Autophagy - animal - Homo sapiens (human) (1)
hsa03430 Mismatch repair - Homo sapiens (human) (1)
hsa04950 Maturity onset diabetes of the young - Homo sapiens (human) (1)
hsa03420 Nucleotide excision repair - Homo sapiens (human) (1)
hsa04973 Carbohydrate digestion and absorption - Homo sapiens (human) (1)
hsa00534 Glycosaminoglycan biosynthesis - heparan sulfate / heparin - Homo sapiens (human) (1)
hsa04145 Phagosome - Homo sapiens (human) (1)
hsa05210 Colorectal cancer - Homo sapiens (human) (1)
hsa00220 Arginine biosynthesis - Homo sapiens (human) (1)
hsa00750 Vitamin B6 metabolism - Homo sapiens (human) (1)
hsa04918 Thyroid hormone synthesis - Homo sapiens (human) (1)
hsa04810 Regulation of actin cytoskeleton - Homo sapiens (human) (1)
hsa05340 Primary immunodeficiency - Homo sapiens (human) (1)
hsa04550 Signaling pathways regulating pluripotency of stem cells - Homo sapiens (human) (1)
hsa05231 Choline metabolism in cancer - Homo sapiens (human) (1)
hsa03320 PPAR signaling pathway - Homo sapiens (human) (1)
hsa00072 Synthesis and degradation of ketone bodies - Homo sapiens (human) (1)
hsa04022 cGMP-PKG signaling pathway - Homo sapiens (human) (1)
hsa04146 Peroxisome - Homo sapiens (human) (1)
hsa05416 Viral myocarditis - Homo sapiens (human) (1)
hsa05020 Prion diseases - Homo sapiens (human) (1)
hsa03022 Basal transcription factors - Homo sapiens (human) (1)
hsa05212 Pancreatic cancer - Homo sapiens (human) (1)
hsa00830 Retinol metabolism - Homo sapiens (human) (1)
hsa05222 Small cell lung cancer - Homo sapiens (human) (1)
hsa04966 Collecting duct acid secretion - Homo sapiens (human) (1)
hsa03018 RNA degradation - Homo sapiens (human) (1)
hsa04720 Long-term potentiation - Homo sapiens (human) (1)
hsa05220 Chronic myeloid leukemia - Homo sapiens (human) (1)
hsa04115 p53 signaling pathway - Homo sapiens (human) (1)
hsa04142 Lysosome - Homo sapiens (human) (1)
hsa05014 Amyotrophic lateral sclerosis (ALS) - Homo sapiens (human) (1)
hsa05100 Bacterial invasion of epithelial cells - Homo sapiens (human) (1)
hsa04152 AMPK signaling pathway - Homo sapiens (human) (1)
hsa03460 Fanconi anemia pathway - Homo sapiens (human) (1)
hsa04150 mTOR signaling pathway - Homo sapiens (human) (1)
hsa04520 Adherens junction - Homo sapiens (human) (1)
hsa00910 Nitrogen metabolism - Homo sapiens (human) (1)
hsa05146 Amoebiasis - Homo sapiens (human) (1)
