# Supplementary material for: Combined systems pharmacology and fecal metabonomics to study the biomarkers and therapeutic mechanism of type 2 diabetic nephropathy treated withAstragalusand Leech
Source: Royal Society of Chemistry journal article supplement (doi:10.1039/c8ra04358b), 2018-01-01
Supplement: c8ra04358b4.xlsx [file c8ra04358b4.xlsx]

## Sheet: Sheet1
Table S4 Herb-active compound-target protein-pathway network of T2DN rats treated by Astragalus and Leech
Herb	No.	Active compound	Target proteins in KEGG	Target proteins in PharmMapper	Uniprot ID	Pathway
Astragalus	A1	3,9-di-O-methylnissolin	L-serine/L-threonine ammonia-lyase [EC: 4.3.1.19]	L-serine dehydratase	P20132	Valine, leucine and isoleucine biosynthesis
			3-hydroxyacyl-CoA dehydrogenase [EC: 1.1.1.35]	Hydroxyacyl-coenzyme A dehydrogenase, mitochondrial	Q16836	Butanoate metabolism
			3-hydroxyacyl-CoA dehydrogenase [EC: 1.1.1.35]	Hydroxyacyl-coenzyme A dehydrogenase, mitochondrial	Q16836	Valine, leucine and isoleucine degradation
	A2	(6aR,11aR)-9,10-dimethoxy-6a,11a-dihydro-6H-benzofurano[3,2-c]chromen-3-ol	Tyrosyl-tRNA synthetase [EC: 6.1.1.1]	Tyrosyl-tRNA synthetase, cytoplasmic	P54577	Aminoacyl-tRNA biosynthesis
Leech	L1	Hirudin	Tryptophanyl-tRNA synthetase [EC: 6.1.1.2]	Tryptophanyl-tRNA synthetase, cytoplasmic	P23381	Aminoacyl-tRNA biosynthesis
			Branched-chain amino acid aminotransferase [EC: 2.6.1.42]	Branched-chain-amino-acid aminotransferase, mitochondrial	O15382	Valine, leucine and isoleucine biosynthesis
			L-serine/L-threonine ammonia-lyase [EC: 4.3.1.19]	L-serine dehydratase	P20132
			3-hydroxyacyl-CoA dehydrogenase [EC: 1.1.1.35]	Hydroxyacyl-coenzyme A dehydrogenase, mitochondrial	Q16836	Butanoate metabolism
			Acetyl-CoA C-acetyltransferase [EC: 2.3.1.9]	Acetyl-CoA acetyltransferase, mitochondrial	P24752
			Isovaleryl-CoA dehydrogenase [EC: 1.3.8.4]	Isovaleryl-CoA dehydrogenase, mitochondrial	P26440	Valine, leucine and isoleucine degradation
			Acetyl-CoA C-acetyltransferase [EC: 2.3.1.9]	Acetyl-CoA acetyltransferase, mitochondrial	P24752
			3-hydroxyacyl-CoA dehydrogenase [EC: 1.1.1.35]	Hydroxyacyl-coenzyme A dehydrogenase, mitochondrial	Q16836
			Branched-chain amino acid aminotransferase [EC: 2.6.1.42]	Branched-chain-amino-acid aminotransferase, mitochondrial	O15382
			Acetyl-CoA C-acetyltransferase [EC: 2.3.1.9]	Acetyl-CoA acetyltransferase, mitochondrial	P24752	Propanoate metabolism
			Pyruvate dehydrogenase E1 component alpha subunit [EC: 1.2.4.1]	Pyruvate dehydrogenase E1 component subunit beta, mitochondrial	P11177	Pyruvate metabolism
			Hydroxyacylglutathione hydrolase [EC: 3.1.2.6]	Hydroxyacylglutathione hydrolase, mitochondrial	Q16775
			Acetyl-CoA C-acetyltransferase [EC: 2.3.1.9]	Acetyl-CoA acetyltransferase, mitochondrial	P24752
	L2	L-isoleucine	Branched-chain amino acid aminotransferase [EC: 2.6.1.42]	Branched-chain-amino-acid aminotransferase, mitochondrial	O15382	Valine, leucine and isoleucine biosynthesis
			Branched-chain amino acid aminotransferase [EC: 2.6.1.42]	Branched-chain-amino-acid aminotransferase, mitochondrial	O15382	Valine, leucine and isoleucine degradation
	L3	Phenylalanine	Tyrosyl-tRNA synthetase [EC: 6.1.1.1]	Tyrosyl-tRNA synthetase, cytoplasmic	P54577	Aminoacyl-tRNA biosynthesis
	L4	Valine	Isovaleryl-CoA dehydrogenase [EC: 1.3.8.4]	Isovaleryl-CoA dehydrogenase, mitochondrial	P26440	Valine, leucine and isoleucine degradation
	L5	Hirudinoidine A	Hydroxyacylglutathione hydrolase [EC: 3.1.2.6]	Hydroxyacylglutathione hydrolase, mitochondrial	Q16775	Pyruvate metabolism
	L6	Hirudinoidine B	Hydroxyacylglutathione hydrolase [EC: 3.1.2.6]	Hydroxyacylglutathione hydrolase, mitochondrial	Q16775	Pyruvate metabolism
	L7	Hirudinoidine C	Hydroxyacylglutathione hydrolase [EC: 3.1.2.6]	Hydroxyacylglutathione hydrolase, mitochondrial	Q16775	Pyruvate metabolism
